# Supplementary material
Source: PubMed Central journal article supplement (PMC5931131)
Supplement: jciinsight-3-99263-s001.pdf [file jciinsight-3-99263-s001.pdf]

## Supplemental Figure Legend

### Supplemental Figure 1

(A) Principal component analysis of gene expression of Panc-1 and BxPC3 cells. All controls: [Ctrl: untreated cells, Ctrl Exo: control exosomes (no siRNA payload), Scr (siScrbl Exo), sirnaExo (exosomes with Kras<sup>G12D</sup> siRNA payload)]. (B-E) Heat map depicting expression of top 1,000 genes (B-D) and differentially expressed genes (statistically significant) (C-E) in Panc-1 (B, C) and BxPC3 (D, E) cells. Red: sirnaExo: exosomes with Kras<sup>G12D</sup> siRNA payload, black: Scr: siScrbl Exo, dark grey: CtrlExo: control exosomes (no siRNA payload), light grey: Ctrl (untreated cells). (F) Gene set enrichment plot for significantly down and up-regulated genes in siKras<sup>G12D-1</sup> Exo treated Panc-1 cells compared to all controls.

### Supplemental Figure 2

(A) Sanger sequencing of PDX tumors (n=2 mice), to confirm the G to A base substitution associated with the glycine to aspartic acid mutation at codon 12 (G12D). (B) Comparison of quantification of tumor burden pre-treatment (baseline) by ultrasound (US, day 58 post tumor induction), and MRI (day 60 post tumor induction), siKras<sup>G12D-1</sup> iExo (n=7) and siScrbl iExo (n=7). Each set of bars for US and MRI represents measures for individual mice. (C) Detailed findings from individual PDX mouse treated with siKras<sup>G12D-1</sup> iExo (n=7) and siScrbl iExo (n=7), showing survival post treatment start (PTS) and post birth (PB), baseline pre-treatment tumor volumes as measure by both ultrasound (US) and MRI, post-treatment MRI measurements of tumor volume, tumor weight (TW) and body weight

(BW) at end point, and observations at necropsy/euthanasia. No measurements for MRI was recorded if the mice were euthanized or the imaging was of poor quality (CNBM: could not be measured). N/A: not applicable. **(D)** Pictures of H&E stained tissue sections showing lesions of inflammation observed in organs of a siKras<sup>G12D-1</sup> iExo treated mouse (A1-B). See accompanying source data.

### **Supplemental Figure 3**

**(A)** Number of exosomes per cell per hour determine by NanoSight™ for each MSC donors listed. Donor 3 was used for all subsequent MSCs-derived exosomes studies. Three independent measurements from distinct conditioned media collection are shown. **(B-C)** Flow cytometry analyses histogram plots of the listed cell surface markers for BJ fibroblast cells (B) and mesenchymal stem cells, MSCs (C). The inset numbers depict the percent positive cells. In grey: isotype control. See accompanying source data.

### **Supplemental Figure 4**

**(A)** Schematic detailing the procedure for MSCs bioreactor culture for collection of exosomes **(B)** Schematic of the isolation and electroporation procedures of exosomes from MSCs conditioned media. **(C)** Schematic depicting the generation of MSCs-derived iExosomes.

### **Supplemental Figure 5**

**(A)** Tabulated data depicting the quantitation of total exosomal protein and number of exosomes in each of the 6 consecutive 48 hours harvests of 250 ml MSCs conditioned

media from the bioreactor. The data are also depicted in Figure 3A-C. **(B)** Quantitation of the number of exosomes produced from three distinct bioreactors. **(C)** Quantitation of the levels of glucose and lactose in the bioreactor, for the total duration of bioreactor experiment (21 days). **(D)** Representative histogram of flow cytometry analysis of exosomal markers (CD9, CD63, CD81) and CD47 on exosomes from all bioreactor harvests (Bioreactor harvests 1 and 6 data are also shown in Figure 3E). Inset numbers represent the percent positive beads. In grey: isotype control. See accompanying source data.

### Supplemental Figure 6

**(A)** Quantification of apoptosis assayed by flow cytometry analyses in 689KPC cells (n=2 distinct experiments). One-way ANOVA comparing experimental groups to untreated. **(B)** Images of H&E stained tissue sections showing representative lesions observed in the pancreas, liver, spleen and kidney of KPC689 mice at experimental endpoint. Control Exo (n=4), BJ siKras<sup>G12D-1</sup> iExo (n=6) and MSCs siKras<sup>G12D-1</sup> iExo (n=6). Scale bar: 100  $\mu$ m. **(C)** Percent mice with macroscopic metastases in the indicated organs at time of necropsy. Control Exo (n=4), BJ siKras<sup>G12D-1</sup> iExo (n=6) and MSCs siKras<sup>G12D-1</sup> iExo (n=6). **(D)** Detailed findings from individual mice with KPC689 tumors treated with Control Exo (n=4), BJ siKras<sup>G12D-1</sup> iExo (n=6) and BJ siKras<sup>G12D-1</sup> iExo (n=6), showing survival post treatment start (PTS) and post birth (PB), tumor weight (TW) and body weight (BW), number of lung macrometastases, and observations at necropsy/euthanasia. **(E)** Tumor burden (%) of KPC689 mice at experimental endpoint. Control Exo (n=4), BJ siKras<sup>G12D-1</sup> iExo (n=6) and MSCs siKras<sup>G12D-1</sup> iExo (n=6). **(F)** Tumor weights (g: grams) of KPC689

mice at experimental endpoint. Control Exo (n=4), BJ siKras<sup>G12D-1</sup> iExo (n=6) and MSCs siKras<sup>G12D-1</sup> iExo (n=6). **(G)** KPC689 orthotopic tumor growth (bioluminescence), and average total flux at day 51, post tumor induction. Control Exo (n=4), BJ siKras<sup>G12D-1</sup> iExo (n=6) and MSCs siKras<sup>G12D-1</sup> iExo (n=6). The mean +/- SEM is depicted and statistical tests are listed for relevant panels. \*\* p<0.01. See accompanying source data.

### Supplemental Figure 7

**(A)** Detailed findings from individual mice with Panc-1 tumors treated with Control Exo (n=4), BJ siKras<sup>G12D-1</sup> iExo (n=6) and BJ siKras<sup>G12D-1</sup> iExo (n=6), showing survival post treatment start (PTS) and post birth (PB), tumor weight (TW) and body weight (BW), and observations at necropsy/euthanasia. \*\* this tumor weight was not included; the pancreas of this mouse was found grossly and histopathologically normal. **(B)** Pictures of H&E stained sections of tumors from Panc-1 tumor bearing mice. Control Exo (n=5), MSCs siKras<sup>G12D-1</sup> iExo, CB (n=5), MSCs siKras<sup>G12D-1</sup> iExo, RB (n=4), BJ siKras<sup>G12D-1</sup> iExo, RB (n=5). Scale bars: 100  $\mu$ m (top) and 50  $\mu$ m (bottom). These data are also depicted in Figure 4O. **(C)** Representative pictures of luciferase activity of Panc-1 orthotopic tumors at day 35 and day 84, post tumor induction. Control Exo (n=5), MSCs siKras<sup>G12D-1</sup> iExo, CB (n=5), MSCs siKras<sup>G12D-1</sup> iExo, RB (n=4), BJ siKras<sup>G12D-1</sup> iExo, RB (n=5). **(D)** Panc-1 orthotopic tumor growth (bioluminescence) over time. Control Exo (n=5), MSCs siKras<sup>G12D-1</sup> iExo, CB (n=5), MSCs siKras<sup>G12D-1</sup> iExo, RB (n=4), BJ siKras<sup>G12D-1</sup> iExo, RB (n=5). **(E)** Tumor burden (%) of Panc-1 tumor bearing mice at experimental endpoint. Control Exo (n=5), MSCs siKras<sup>G12D-1</sup> iExo, CB (n=5), MSCs siKras<sup>G12D-1</sup> iExo, RB (n=4), BJ siKras<sup>G12D-1</sup> iExo, RB (n=5). **(F)** Tumor weights (g: grams) of Panc-1 tumor bearing

mice at experimental endpoint. Control Exo (n=5), MSCs siKras<sup>G12D-1</sup> iExo, CB (n=5), MSCs siKras<sup>G12D-1</sup> iExo, RB (n=4), BJ siKras<sup>G12D-1</sup> iExo, RB (n=5). **(G)** Flow cytometry analyses and quantification of apoptosis in Panc-1 cells comparing the efficacy of 48 distinct electroporation conditions (A1-A16; B1-B16; C1-C16) of MSCs and BJ Fibroblast siKras<sup>G12D</sup> iExosomes, using a large volume electroporation system and CB (n=2 distinct experiments). The electroporation condition subsequently chosen was A-14. The mean +/- SEM is depicted. See accompanying source data.

### **Supplemental Figure 8**

**(A)** Schematic representation of the experiment using KPC689 orthotopic tumor bearing mice (related to experiment in Figure 5E). **(B)** Comparison of baseline tumor bioluminescence (total Flux) pre-treatment, of KPC689 orthotopic experiments 1 and 2, to show baseline tumor measurements pre-treatment of Experiment-2 was higher than that of Experiment-1. Experiment-1: Control Exo (n=4), BJ siKras<sup>G12D-1</sup> iExo (n=6) and MSCs siKras<sup>G12D-1</sup> iExo (n=6). Experiment-2: CB/PBS (n=7), Control Exo (n=7), Gemcitabine (n=8), MSCs siKras<sup>G12D-2</sup> iExo (n=8), Gemcitabine + MSCs siKras<sup>G12D-2</sup> iExo (n=8). Two-tailed unpaired t test between experiment 1 and 2. **(C)** Detailed findings from individual mice with KPC689 tumors (Experiment-2) treated with CB/PBS (n=7), Control Exo (n=7), Gemcitabine (n=8), MSCs siKras<sup>G12D-2</sup> iExo (n=8), Gemcitabine + MSCs siKras<sup>G12D-2</sup> iExo (n=8), showing survival post treatment start (PTS) and post birth (PB), tumor weight (TW) and body weight (BW), number of lung macrometastases, and observations at necropsy/euthanasia. **(D)** Representative images of H&E stained sections of pancreatic tumors from KPC689 tumor bearing mice. Scale bars 100  $\mu$ m (top)

and 50  $\mu\text{m}$  (bottom). CB/PBS (n=7), Control Exo (n=7), Gemcitabine (n=8), MSCs siKras<sup>G12D-2</sup> iExo (n=8), Gemcitabine + MSCs siKras<sup>G12D-2</sup> iExo (n=8). The mean +/- SEM is depicted. See accompanying source data.

### **Supplemental Figure 9**

(A) Schematic representation of the experiment using KPC689 orthotopic tumor bearing mice (related to experiment in Figure 5F). (B) Detailed findings from individual mice with KPC689 tumors treated with CB/PBS (n=7), Control Exo (n=7), Gemcitabine (n=7), MSCs siKras<sup>G12D-2</sup> iExo (n=7), Gemcitabine + MSCs siKras<sup>G12D-2</sup> iExo (n=7), showing survival post treatment start (PTS) and post birth (PB), tumor weight (TW) and body weight (BW), number of lung macrometastases, and observations at necropsy/euthanasia.

### **Supplemental Figure 10**

(A) Cytotoxicity tests performed on the blood collected from adult C57Bl/6J mice injected i.p. every other day for 120 days. PBS (n=3), BJ fibroblasts exosomes (n=4). ALT: alanine aminotransferase; AST: aspartate aminotransferase; BUN: blood urea nitrogen. The grey highlight defines the normal range. (B) Representative pictures of H&E stained tissue sections showing lesions of inflammation observed in the mesenteric lymph node, kidney, liver and gall-bladder.

### **Supplemental Figure 11**

(A) Immunotyping analyses of spleen, bone marrow and thymus of immunocompetent non-tumor bearing mice administered with the indicated treatments. ‡: these values are not

erroneous despite their similarities. #: this group shows statistical significant differences with exosomes treated mice but not with CB. **(B)** ELISA for IL-6 in the indicated groups. 0 denotes that the levels were below the limits of the assay (not detected).

### **Supplemental Figure 12**

**(A)** Biodistribution in the indicated organs of DiR labeled MSCs exosomes 6 hours post i.v. injection in nude mice (left) or 3 hours post i.v. injection in tumor bearing (KPC689) C57BL/6 mice. DiR only (n=1), DiR labeled MSCs exosomes (n=2). **(B)** Biodistribution in the indicated organs of DiR labeled MSCs exosomes 3 hours post i.p. or i.v. injection of C57BL/6 non-tumor bearing mice. **(C)** Biodistribution in the indicated organs of DiR labeled MSCs exosomes 24 and 48 hours post i.p. injection tumor bearing (KPC689) C57BL/6 mice. These tumors are depicted in Figure 7B.

### **Supplemental Figure 13**

**(A)** Representative dot plot of flow cytometry analyses of apoptosis in Panc-1 cells induced by MSCs siKras<sup>G12D-2</sup> iExosomes freeze/thaw during 3 and 6 months showing similar efficiency that fresh iExosomes. n=2 independent experiments, quantitation is shown in Figure 6I. **(B)** Detailed findings from individual PKS mice treated with MSCs siKras<sup>G12D-2</sup> iExo (n=4) and Control Exo (n=5), showing treatment groups, start of treatment, survival of mice, body weight (BW) and tumor weight (TW) at experimental endpoint. See accompanying source data.

### **Supplementary Table 1**

Detailed necropsy analyses of C57BL/6 mice injected i.p. with either empty BJ Fibroblast exosomes (n=4) or PBS (n=3), every other day, for 120 days.

### **Supplemental Table 2**

Summary of treatments for the in vivo experiments.

### **Supplementary Table 3**

Detailed information on the antibodies used in this study.





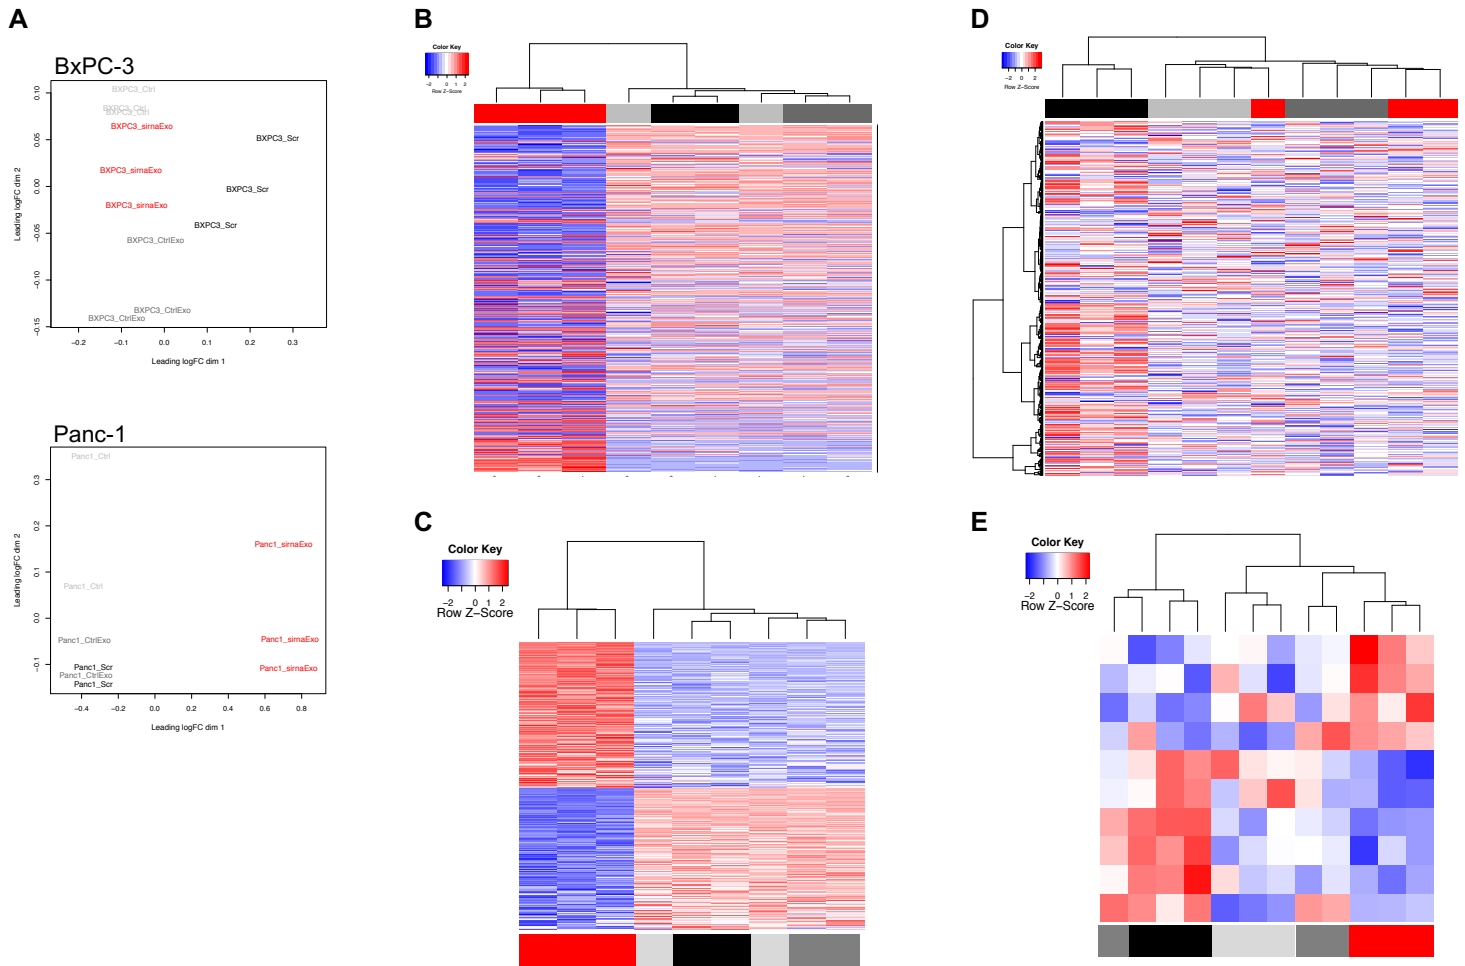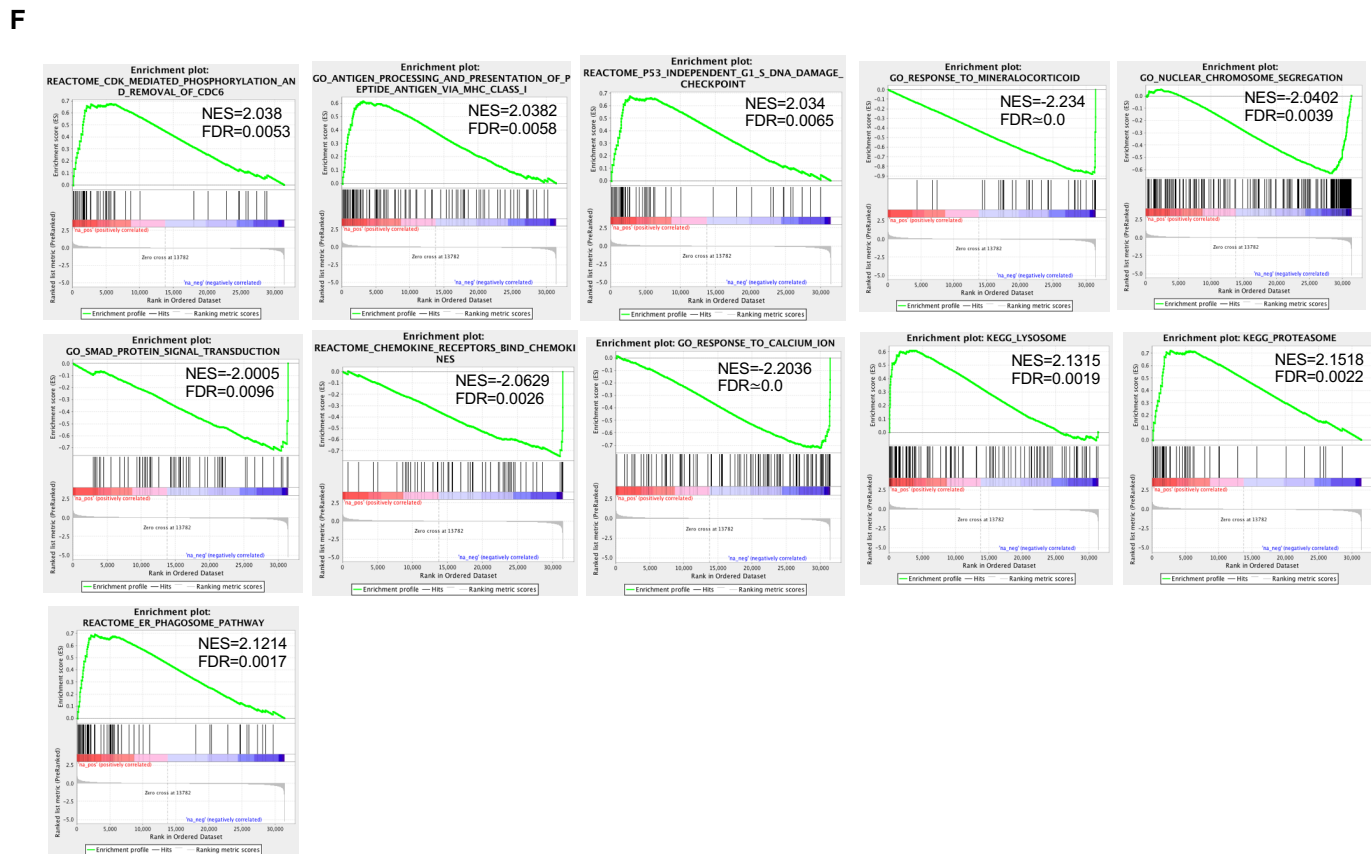

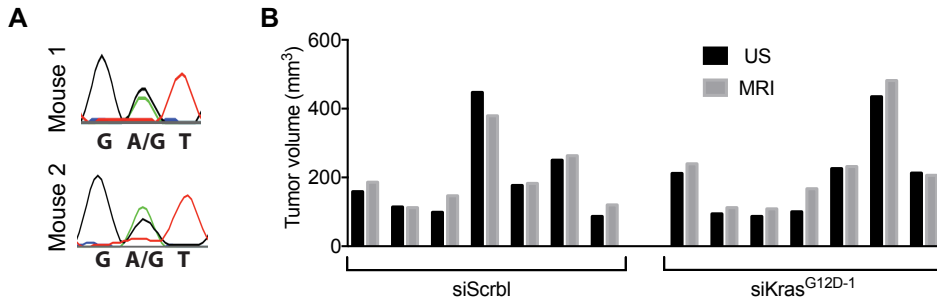

**C**

| Mouse ID        | Treatment       | Survival (Days) |     | Pre-treatment           |                          |       | Post-treatment | Post-treatment | Post-treatment | End-point   |       | Observations                                                                         | Notes            |
|-----------------|-----------------|-----------------|-----|-------------------------|--------------------------|-------|----------------|----------------|----------------|-------------|-------|--------------------------------------------------------------------------------------|------------------|
|                 |                 | PTS             | PB  | Tumor volume (mm3) (US) | Tumor volume (mm3) (MRI) | BW(g) | MRI-2          | MRI-3          | MRI-4          | TW(g)       | BW(g) |                                                                                      |                  |
| A1-Y            | siKrasG12D iExo | 133             | 286 | 211.87                  | 239.56                   | 23.4  | CNBM           | CNBM           | Euthanized     | 0.87        | 28.8  | Jaundice, very small tumor burden                                                    | No               |
| A1-B            | siKrasG12D iExo | 316             | 469 | 94.49                   | 112.27                   | 24.6  | 415.44         | 146.24         | 26.98          | 0.38        | 31.9  | Hunched, swollen intestine, kidney atrophy, mesenteric abscess, minimal tumor burden | No               |
| A1-G            | siKrasG12D iExo | 257             | 410 | 86.84                   | 108.52                   | 22.1  | 515.05         | 126.97         | 10.38          | 0.2         | 23.8  | Hunched, kidney atrophy, minimal tumor burden                                        | No               |
| A1-O            | siKrasG12D iExo | 360             | 513 | 100.08                  | 167.31                   | 25.3  | 363.45         | 150.16         | 63.84          | 0.24        | 24.2  | Enlarged mesenteric lymph node, minimal tumor burden                                 | No               |
| A1-W            | siKrasG12D iExo | 254             | 407 | 225.92                  | 231.50                   | 23.6  | CNBM           | 212.13         | 50.44          | 0.28        | 28.1  | Enlarged eyes, euthanasia due to neurological problems, small tumor                  | No               |
| A2-Y            | siKrasG12D iExo | 35              | 188 | 434.96                  | 481.62                   | 22.1  | 642.22         | Euthanized     | Euthanized     | 1.4         | 29.2  | Moderate tumor burden, euthanized as an age-matched comparison to B1-O               | N/A: age-matched |
| A2-NT           | siKrasG12D iExo | 178             | 331 | 212.71                  | 206.30                   | 25.1  | CNBM           | 965.71         | CNBM           | 1.8         | 32.2  | Small primary tumor, large secondary tumor, euthanized due to tumor burden           | Yes              |
| <b>Average:</b> |                 |                 |     | <b>195.27</b>           | <b>221.01</b>            |       | <b>484.04</b>  | <b>320.24</b>  | <b>37.91</b>   | <b>0.74</b> |       |                                                                                      |                  |
| B1-Y            | siScrbl iExo    | 206             | 359 | 158.60                  | 186.11                   | 25.0  | CNBM           | 654.78         | Euthanized     | 1.21        | 26.1  | Moderate tumor burden, hunched, scaly skin at euthanasia                             | Yes              |
| B1-B            | siScrbl iExo    | 168             | 321 | 114.13                  | 112.30                   | 24.4  | 773.19         | 805.08         | Euthanized     | 1.61        | 26.0  | Moderate tumor burden, weak, swollen bowel                                           | Yes              |
| B1-G            | siScrbl iExo    | 144             | 297 | 98.81                   | 146.54                   | 23.1  | 961.41         | 1977.47        | Euthanized     | 5.84        | 27.9  | Extensive tumor burden, hunched posture, weak                                        | Yes              |
| B1-O            | siScrbl iExo    | 35              | 188 | 447.43                  | 379.32                   | 22.9  | 1254.40        | Euthanized     | Euthanized     | 2.3         | 31.2  | Extensive tumor burden, euthanized due to tumor burden, aged matched with A2-Y       | Yes              |
| B1-W            | siScrbl iExo    | 102             | 255 | 176.84                  | 182.64                   | 24.8  | CNBM           | 2225.12        | Euthanized     | 4.67        | 34.1  | Large primary and secondary tumors, spleen invasion, macroscopic liver nodules       | N/A: age-matched |
| B2-Y            | siScrbl iExo    | 158             | 311 | 250.26                  | 263.35                   | 26.1  | 950.14         | CNBM           | Euthanized     | 2.4         | 28.8  | Extensive tumor burden, weak, hunched posture                                        | Yes              |
| B2-NT           | siScrbl iExo    | 69              | 222 | 86.75                   | 120.45                   | 25.4  | CNBM           | 969.73         | Euthanized     | 1.69        | 29.2  | Weak, moderate tumor burden, spleen atrophy                                          | Yes              |
| <b>Average:</b> |                 |                 |     | <b>190.40</b>           | <b>198.68</b>            |       | <b>984.79</b>  | <b>1326.43</b> |                | <b>2.82</b> |       |                                                                                      |                  |

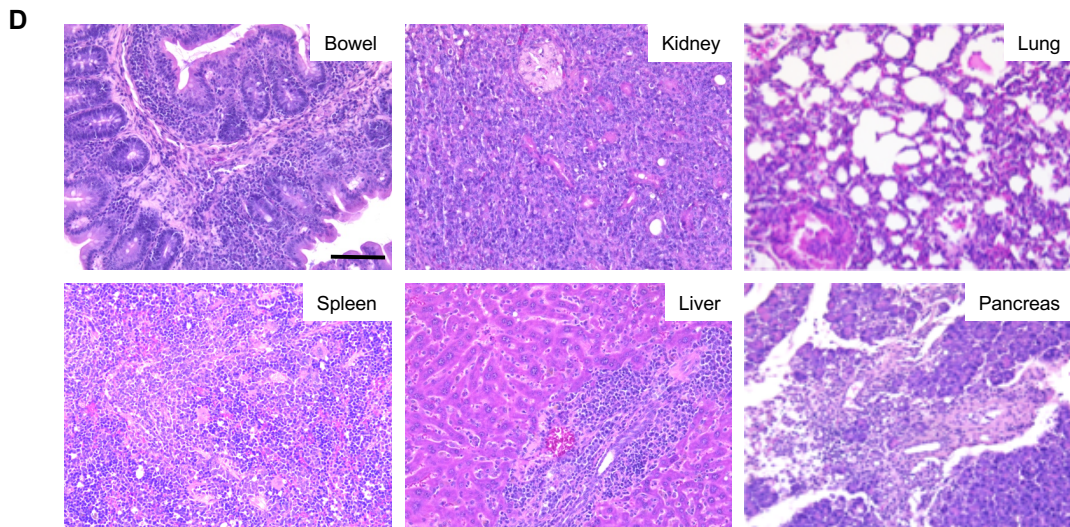

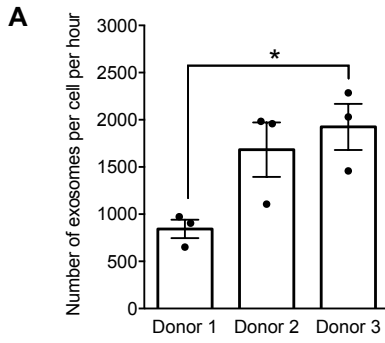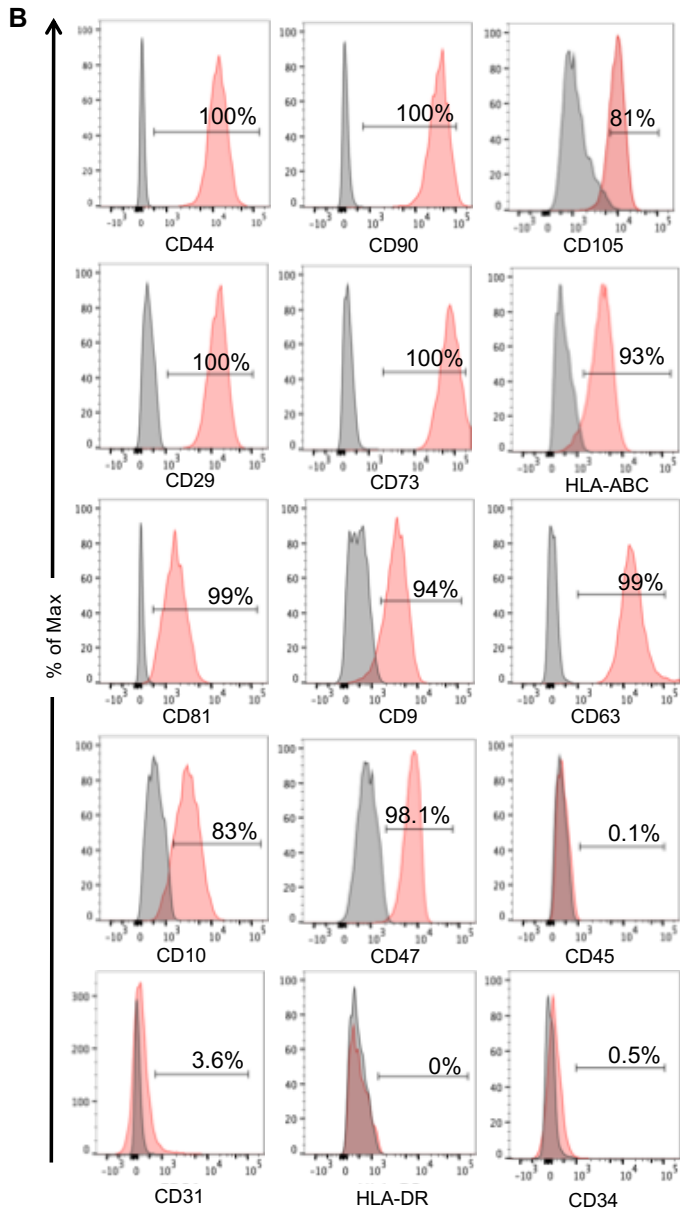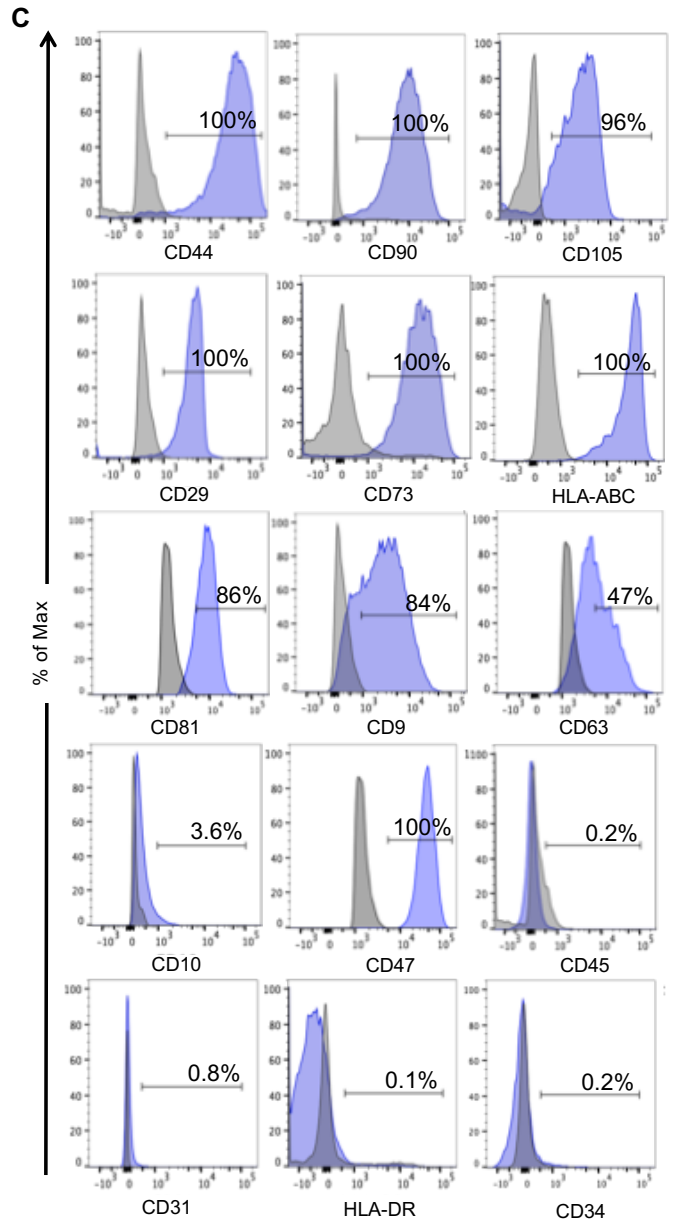

**A** Timeline for MSCs-derived exosomes production using a bioreactor

| Day 0                                       | Day 1                                       | Day 2                                       | Day 3                                       | Day 4                                       | Day 5                                       | Day 6 | Day 7 | Day 8                                 | Day 9 |
|---------------------------------------------|---------------------------------------------|---------------------------------------------|---------------------------------------------|---------------------------------------------|---------------------------------------------|-------|-------|---------------------------------------|-------|
| Preparation of bioreactor                   | Seeding of MSCs                             | Expansion of MSCs in growth media           |                                             |                                             |                                             |       |       | Wash with PBS and load PLT-free media |       |
| Day 11                                      | Day 13                                      | Day 15                                      | Day 17                                      | Day 19                                      | Day 21                                      |       |       |                                       |       |
| Bioreactor Harvest 1<br>↓<br>Freeze (-80°C) | Bioreactor Harvest 2<br>↓<br>Freeze (-80°C) | Bioreactor Harvest 3<br>↓<br>Freeze (-80°C) | Bioreactor Harvest 4<br>↓<br>Freeze (-80°C) | Bioreactor Harvest 5<br>↓<br>Freeze (-80°C) | Bioreactor Harvest 6<br>↓<br>Freeze (-80°C) |       |       |                                       |       |

**B** Isolation of and generation of MSCs-derived iExosomes

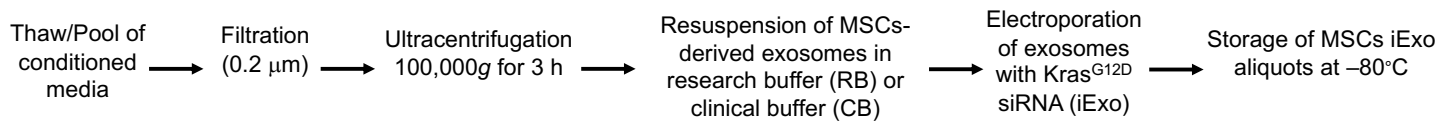

**C** Generation of GMP grade MSCs-derived iExosomes

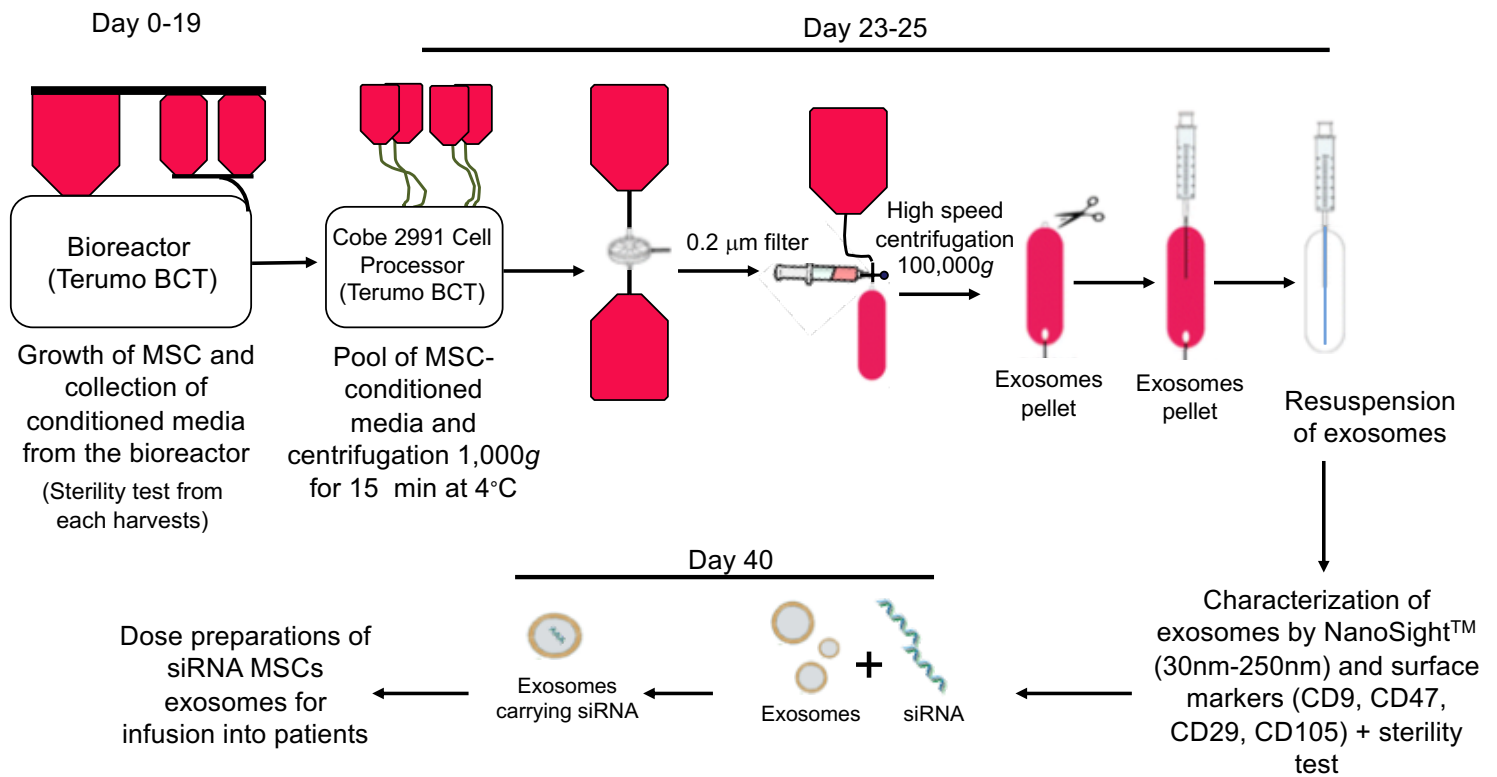

**A**

| Bioreactor harvests: | Harvest time (days) | Volume (ml) | Protein (mg) | Exosomes (x10 <sup>9</sup> ) |
|----------------------|---------------------|-------------|--------------|------------------------------|
| Harvest 1            | 10                  | 250         | 2.641        | 2010                         |
| Harvest 2            | 12                  | 250         | 6.222        | 4493                         |
| Harvest 3            | 14                  | 250         | 3.606        | 3402                         |
| Harvest 4            | 16                  | 250         | 3.534        | 3472                         |
| Harvest 5            | 18                  | 250         | 0.992        | 983                          |
| Harvest 6            | 20                  | 250         | 1.040        | 1210                         |

**B**

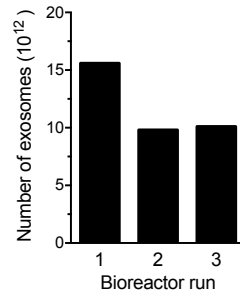

**C**

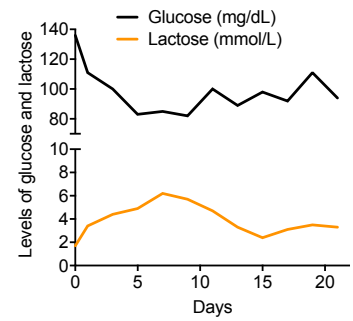

**D**

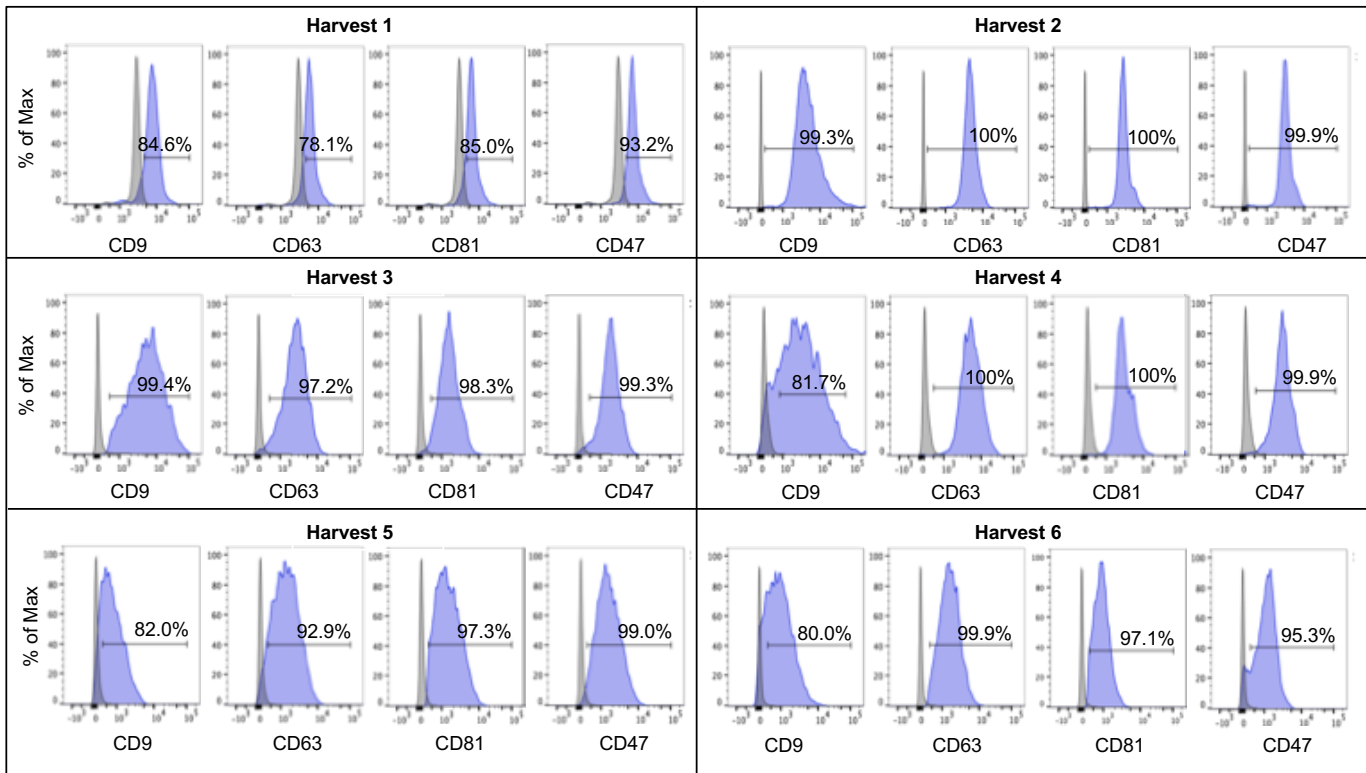

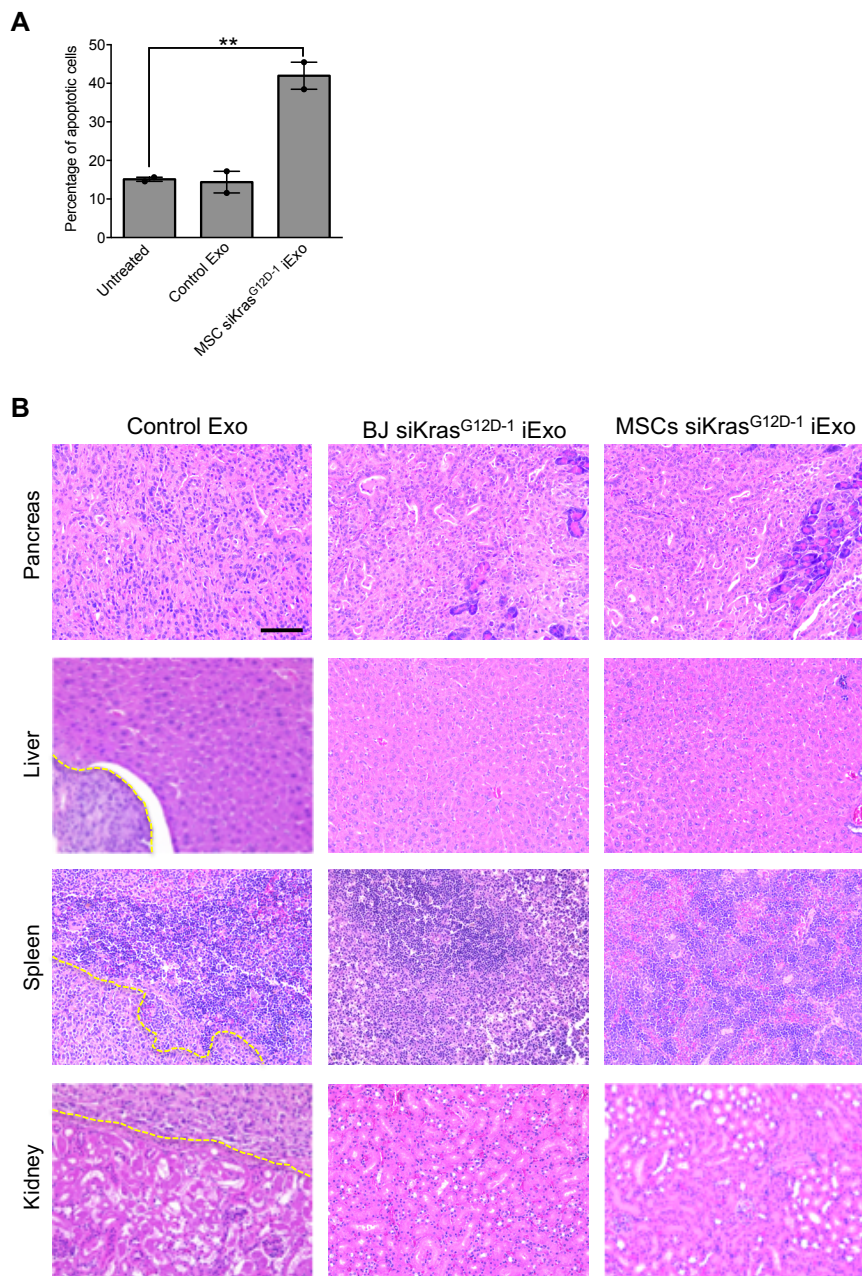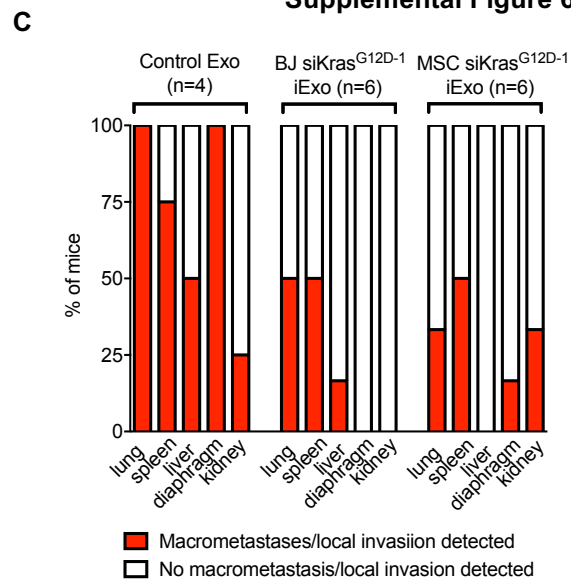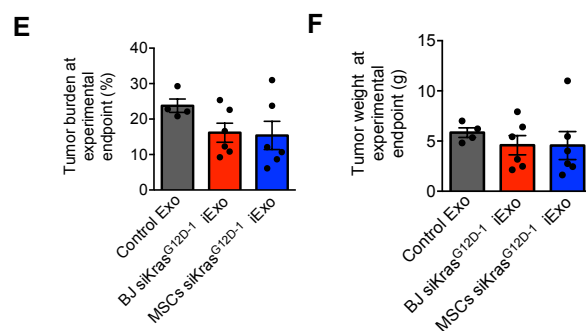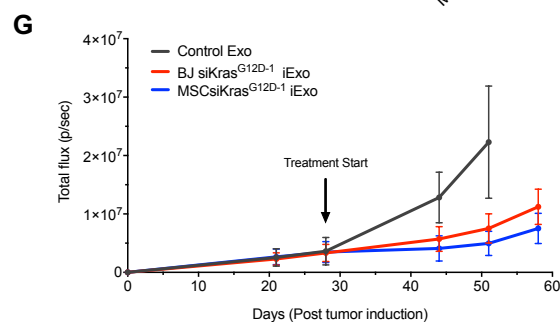

**D**

| Treatment                          | Survival (Days) |     | Pre-treatment |       | End-point   |                       |                                                                                                                                     | Observations | Notes |
|------------------------------------|-----------------|-----|---------------|-------|-------------|-----------------------|-------------------------------------------------------------------------------------------------------------------------------------|--------------|-------|
|                                    | PTS             | PB  | BW(g)         | TW(g) | BW(g)       | Lung macro metastases | Necropsy notes                                                                                                                      |              |       |
| MSCs Ctrl Exo                      | 44              | 107 | 20.50         | 4.81  | 23.11       | 59                    | Large primary and secondary tumors, spleen invasion, liver invasion, diaphragm invasion, macroscopic lung nodules                   | Yes          |       |
| MSCs Ctrl Exo                      | 37              | 100 | 20.00         | 7.00  | 23.90       | 49                    | Large primary and secondary tumors, spleen invasion, diaphragm invasion, kidney invasion, macroscopic lung nodules                  | Yes          |       |
| MSCs Ctrl Exo                      | 37              | 100 | 21.30         | 5.34  | 24.12       | 42                    | Large primary and secondary tumors, diaphragm invasion, macroscopic lung nodules                                                    | Yes          |       |
| MSCs Ctrl Exo                      | 44              | 107 | 21.60         | 6.22  | 27.26       | 76                    | Large primary and secondary tumors, spleen invasion, liver invasion, diaphragm invasion, macroscopic lung nodules                   | Yes          |       |
| Average:                           |                 |     |               |       | <b>5.84</b> |                       |                                                                                                                                     |              |       |
| BJ siKras <sup>G12D-1</sup> iExo   | 37              | 100 | 20.80         | 2.14  | 23.20       | 35                    | Moderate tumor, spleen invasion, macroscopic lung nodules                                                                           | Yes          |       |
| BJ siKras <sup>G12D-1</sup> iExo   | 49              | 112 | 20.20         | 3.18  | 25.89       | 0                     | Moderate tumor, hunched, weak                                                                                                       | Yes          |       |
| BJ siKras <sup>G12D-1</sup> iExo   | 66              | 129 | 20.50         | 7.92  | 31.24       | 0                     | Moderate tumor burden, hunched, spleen invasion, liver invasion                                                                     | Yes          |       |
| BJ siKras <sup>G12D-1</sup> iExo   | 75              | 138 | 19.70         | 2.41  | 22.87       | 2                     | Moderate tumor burden, spleen invasion, necrosis of primary tumor, macroscopic lung nodules                                         | Yes          |       |
| BJ siKras <sup>G12D-1</sup> iExo   | 101             | 164 | 20.30         | 6.40  | 28.31       | 0                     | Moderate tumor burden, hole in primary tumor hunched, weak                                                                          | Yes          |       |
| BJ siKras <sup>G12D-1</sup> iExo   | 120             | 183 | 19.80         | 5.43  | 32.64       | 5                     | Moderate tumor burden, macroscopic lung nodules                                                                                     | Yes          |       |
| Average:                           |                 |     |               |       | <b>4.58</b> |                       |                                                                                                                                     |              |       |
| MSCs siKras <sup>G12D-1</sup> iExo | 54              | 117 | 21.30         | 1.62  | 26.40       | 0                     | Small tumor, no invasion                                                                                                            | No           |       |
| MSCs siKras <sup>G12D-1</sup> iExo | 54              | 117 | 21.60         | 2.76  | 31.86       | 0                     | Small tumor, no invasion, some internal bleeding                                                                                    | Yes          |       |
| MSCs siKras <sup>G12D-1</sup> iExo | 75              | 138 | 19.70         | 5.64  | 23.00       | 0                     | Moderate tumor burden, no invasion, necrosis of primary tumor                                                                       | Yes          |       |
| MSCs siKras <sup>G12D-1</sup> iExo | 78              | 141 | 19.80         | 2.46  | 22.93       | 0                     | Moderate tumor, tumour in thoracic cavity, necrosis of primary tumor                                                                | Yes          |       |
| MSCs siKras <sup>G12D-1</sup> iExo | 82              | 145 | 21.00         | 4.01  | 33.46       | 6                     | Moderate tumor, necrosis of primary and secondary (subcutaneous) tumors, spleen invasion, kidney invasion, macroscopic lung nodules | Yes          |       |
| MSCs siKras <sup>G12D-1</sup> iExo | 115             | 178 | 21.00         | 11.00 | 35.48       | 32                    | Moderate tumor burden, spleen invasion, kidney invasion, diaphragm invasion, macroscopic lung nodules                               | Yes          |       |
| Average:                           |                 |     |               |       | <b>4.58</b> |                       |                                                                                                                                     |              |       |

**Figure 6B**

| Untreated | LS   | HS   |
|-----------|------|------|
| 13.2      | 78.0 | 86.3 |
| 12.9      | 90.0 | 89.0 |
| 11.1      | 84.0 | 82.0 |

**Figure 6C**

|                  | Delta Ct |       |       | fold |      |      |
|------------------|----------|-------|-------|------|------|------|
| <b>Untreated</b> | 11.19    | 8.69  | 9.48  | 1.00 | 1.00 | 1.00 |
| <b>LS</b>        | 13.28    | 11.10 | 12.76 | 0.23 | 0.19 | 0.10 |
| <b>HS</b>        | 13.20    | 12.95 | 13.50 | 0.25 | 0.05 | 0.06 |

**Figure 6D**

| siKras <sup>G12D-1</sup> input | siKras <sup>G12D-2</sup> input | MSC siKras <sup>G12D-1</sup>  Exo, HS, CB | MSC siKras <sup>G12D-1</sup>  Exo, HS, CB + RN | MSC siKras <sup>G12D-1</sup>  Exo, HS, CB + T + RN | MSC siKras <sup>G12D-1</sup>  Exo, LS, RB | BJ siKras <sup>G12D-1</sup>  Exo, LS, RB | MSC siKras <sup>G12D-2</sup>  Exo, LS, RB |
|--------------------------------|--------------------------------|-------------------------------------------|------------------------------------------------|----------------------------------------------------|-------------------------------------------|------------------------------------------|-------------------------------------------|
| 0.05304851                     | 0.05296884                     | 0.05365822                                | 0.05240104                                     | 0.04080845                                         | 0.05203353                                | 0.05106859                               | 0.05106397                                |
|                                |                                | 0.05272926                                | 0.05380001                                     | 0.03918899                                         | 0.05270242                                | 0.05184339                               | 0.05157713                                |
|                                |                                | 0.05333581                                | 0.05158886                                     | 0.04099962                                         | 0.05054021                                | 0.05079002                               | 0.05264135                                |

**Figure 6E, F:** see Supplemental Figures 8C and 9B, respectively.



A

| Treatment                 | Survival (Days) |     | Pre-treatment | End-point   |       | Observations                                                                                                                                                       |
|---------------------------|-----------------|-----|---------------|-------------|-------|--------------------------------------------------------------------------------------------------------------------------------------------------------------------|
|                           | PTS             | PB  | BW(g)         | TW(g)       | BW(g) | Necropsy notes                                                                                                                                                     |
| MSCs Ctrl Exo             | 70              | 133 | 29.40         | 1.89        | 23.00 | Small tumor, hunched, diarrhea, no invasion                                                                                                                        |
| MSCs Ctrl Exo             | 71              | 134 | 31.10         | 2.96        | 33.26 | Moderate tumor burden, spleen and liver invasion, ascites                                                                                                          |
| MSCs Ctrl Exo             | 85              | 148 | 28.70         | 2.03        | 30.57 | Moderate tumor burden, diaphragm, spleen and kidney invasion                                                                                                       |
| MSCs Ctrl Exo             | 99              | 162 | 34.90         | 3.26        | 36.22 | Moderate tumor burden, abdominal inflammation, ascites, spleen and diaphragm invasion                                                                              |
| MSCs Ctrl Exo             | 113             | 176 | 25.50         | 3.10        | 28.97 | Moderate tumor burden, diaphragm invasion, ascitis                                                                                                                 |
| <i>Average:</i>           |                 |     |               | <b>2.65</b> |       |                                                                                                                                                                    |
| BJ siKrasG12D-1 iExo RB   | 113             | 176 | 29.30         | 0.30        | 25.00 | No tumor, hunched posture, diarrhea, no invasion                                                                                                                   |
| BJ siKrasG12D-1 iExo RB   | 143             | 206 | 28.20         | 2.83        | 27.21 | Moderate tumor burden, hunched posture weak, no invasion                                                                                                           |
| BJ siKrasG12D-1 iExo RB   | 145             | 208 | 29.00         | 4.05        | 38.50 | Moderate tumor burden, hepatomegaly and splenomegaly                                                                                                               |
| BJ siKrasG12D-1 iExo RB   | 165             | 228 | 27.80         | 2.36        | 28.00 | Moderate tumor burden, spleen invasion                                                                                                                             |
| BJ siKrasG12D-1 iExo RB   | 221             | 284 | 31.80         | 2.54        | 28.20 | Moderate tumor burden, diaphragm, liver and spleen invasion                                                                                                        |
| <i>Average:</i>           |                 |     |               | <b>2.42</b> |       |                                                                                                                                                                    |
| MSCs siKrasG12D-1 iExo RB | 165             | 228 | 31.30         | 1.47        | 21.00 | Severe abdominal inflammation, diaphragm and kidney invasion, mesenteric metastases                                                                                |
| MSCs siKrasG12D-1 iExo RB | 145             | 208 | 33.00         | 6.27        | 36.00 | Large primary tumor, diaphragm, liver and spleen invasion                                                                                                          |
| MSCs siKrasG12D-1 iExo RB | 130             | 193 | 32.00         | 3.39        | 28.25 | Moderate tumor burden, no invasion                                                                                                                                 |
| MSCs siKrasG12D-1 iExo RB | 198             | 261 | 27.90         | 0.5         | 25.00 | Small tumor burden, no invasion                                                                                                                                    |
| <i>Average:</i>           |                 |     |               | <b>2.91</b> |       |                                                                                                                                                                    |
| BJ siKrasG12D-1 iExo CB   | 111             | 174 | 31.50         | 1.15        | 21.30 | Moderate tumor burden, diaphragm invasion                                                                                                                          |
| BJ siKrasG12D-1 iExo CB   | 117             | 180 | 27.40         | 1.24        | 34.40 | Moderate tumor, no invasion, ascites                                                                                                                               |
| BJ siKrasG12D-1 iExo CB   | 221             | 284 | 30.40         | 0.31        | 18.00 | No tumor, hunched posture, weak, diarrhea, severe weight loss, no invasion                                                                                         |
| BJ siKrasG12D-1 iExo CB   | 226             | 289 | 28.60         | 2.29        | 32.71 | Moderate tumor burden, diaphragm and, liver invasion                                                                                                               |
| BJ siKrasG12D-1 iExo CB   | 335             | 398 | 27.50         | 2.27**      | 30.59 | Mouse did not reach moribundancy but showed decreased activity. The pancreas appears normal yet a mesenteric tumor is noted together with invasion in the kidneys. |
| <i>Average:</i>           |                 |     |               | <b>1.25</b> |       |                                                                                                                                                                    |

B

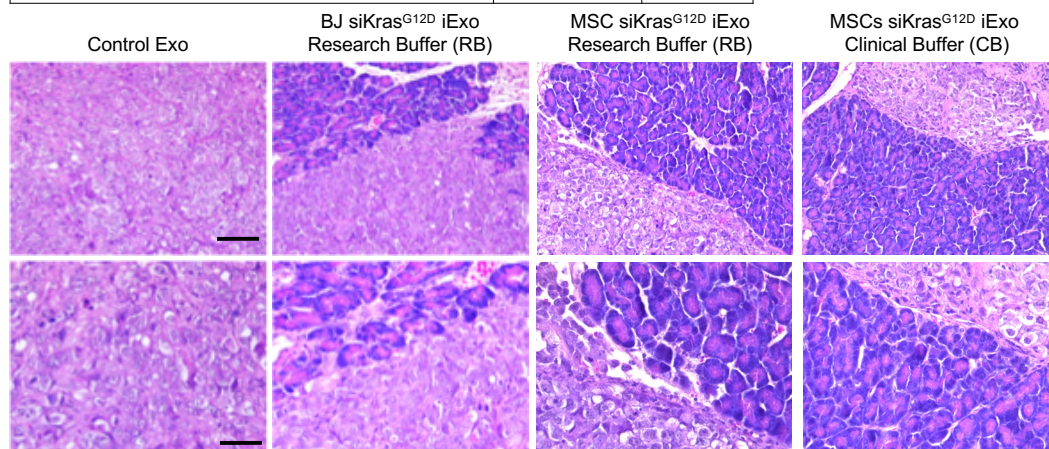

E

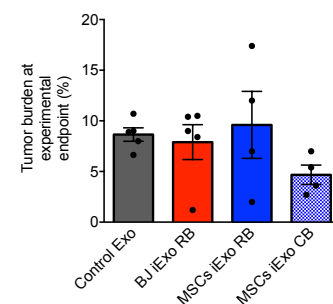

C

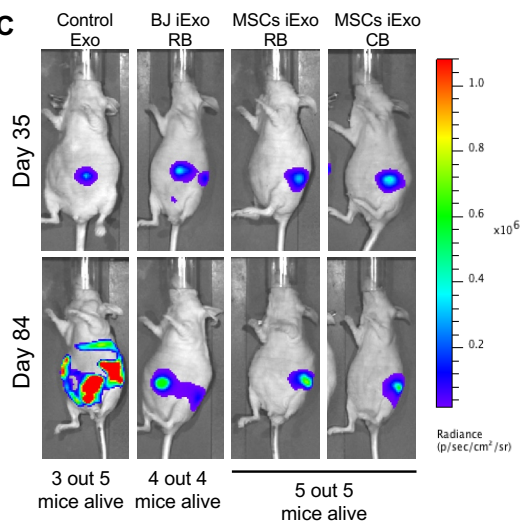

D

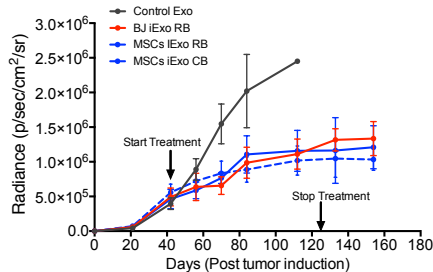

F

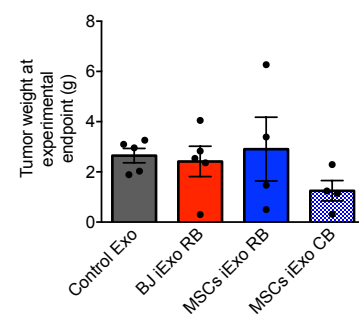

G

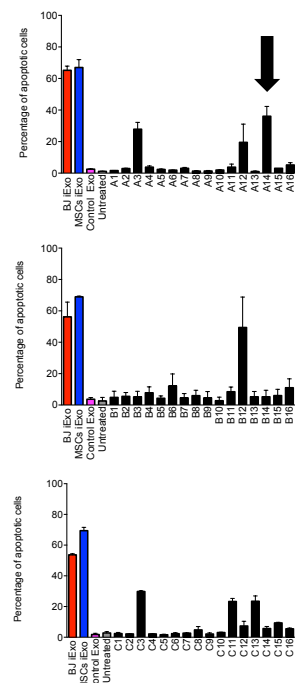

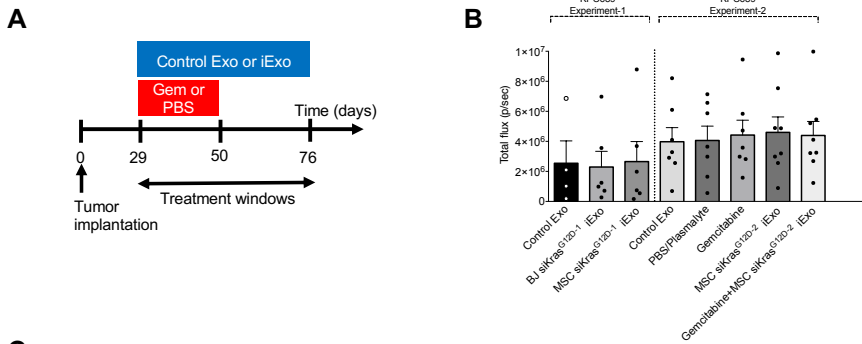

**C**

| Treatment                     | Survival (Days) |     | Pre-treatment |             | End-point |      | Lung Metastases                                                                                    | Observations |
|-------------------------------|-----------------|-----|---------------|-------------|-----------|------|----------------------------------------------------------------------------------------------------|--------------|
|                               | PTS             | PB  | BW(g)         | TW(g)       | BW(g)     |      |                                                                                                    |              |
| CB/PBS                        | 32              | 95  | 21.20         | 3.26        | 24.00     | 0    | Moderate tumor burden, diaphragm invasion                                                          |              |
| CB/PBS                        | 34              | 97  | 20.50         | 4.90        | 21.97     | 4    | Moderate tumor burden, spleen and diaphragm invasion, macroscopic lung nodules                     |              |
| CB/PBS                        | 35              | 98  | 19.30         | 2.55        | 18.22     | 0    | Moderate tumor burden, peritoneal, diaphragm, spleen and kidney invasion, macroscopic lung nodules |              |
| CB/PBS                        | 35              | 98  | 20.90         | 2.86        | 20.40     | 0    | Moderate tumor burden, diaphragm invasion                                                          |              |
| CB/PBS                        | 41              | 104 | 20.78         | 2.14        | 20.78     | 6    | Moderate tumor burden, peritoneal and diaphragm invasion, macroscopic lung nodules                 |              |
| CB/PBS                        | 39              | 102 | 19.70         | 3.75        | 18.85     | 0    | Moderate tumor burden, spleen, liver and kidney invasion                                           |              |
| CB/PBS                        | 41              | 104 | 21.50         | 3.26        | 24.02     | 0    | Moderate tumor burden, diaphragm invasion                                                          |              |
| Average:                      |                 |     |               | <b>3.25</b> |           |      |                                                                                                    |              |
| MSCs Ctrl Exo                 | 42              | 105 | 21.10         | 3.72        | 20.20     | 0    | Moderate tumor burden, spleen, diaphragm invasion                                                  |              |
| MSCs Ctrl Exo                 | 39              | 102 | 19.80         | 5.10        | 23.60     | 8    | Moderate tumor burden, spleen, kidney, liver and diaphragm invasion, macroscopic lung nodules      |              |
| MSCs Ctrl Exo                 | 50              | 113 | 18.50         | 6.32        | 24.98     | >200 | Moderate tumor burden, spleen, kidney and diaphragm invasion, macroscopic lung nodules             |              |
| MSCs Ctrl Exo                 | 46              | 109 | 19.30         | 3.67        | 19.70     | 2    | Moderate tumor burden, spleen and kidney invasion, macroscopic lung nodules                        |              |
| MSCs Ctrl Exo                 | 34              | 97  | 20.90         | 2.86        | 17.50     | 0    | Moderate tumor burden, spleen, liver and diaphragm invasion                                        |              |
| MSCs Ctrl Exo                 | 36              | 99  | 21.30         | 2.83        | 22.80     | 0    | Moderate tumor burden, spleen and diaphragm invasion                                               |              |
| MSCs Ctrl Exo                 | 32              | 95  | 18.40         | 4.52        | 19.70     | 2    | Moderate tumor burden, diaphragm invasion, macroscopic lung nodules                                |              |
| Average:                      |                 |     |               | <b>4.15</b> |           |      |                                                                                                    |              |
| Gemcitabine                   | 39              | 102 | 18.70         | 0.54        | 23.47     | 0    | Very small tumor, diaphragm invasion                                                               |              |
| Gemcitabine                   | 41              | 104 | 20.20         | 2.54        | 24.66     | 1    | Moderate tumor burden, spleen, kidney and diaphragm invasion, macroscopic lung nodules             |              |
| Gemcitabine                   | 50              | 113 | 21.90         | 2.3         | 18.00     | 0    | Moderate tumor burden, no invasion                                                                 |              |
| Gemcitabine                   | 44              | 107 | 22.20         | 4.77        | 28.05     | 0    | Moderate tumor burden, spleen, kidney and diaphragm invasion, ascites                              |              |
| Gemcitabine                   | 60              | 123 | 20.20         | 0.57        | 13.25     | 0    | Small tumor, diaphragm invasion                                                                    |              |
| Gemcitabine                   | 46              | 109 | 19.10         | 1.5         | 27.20     | 0    | Moderate tumor burden, no invasion                                                                 |              |
| Gemcitabine                   | 60              | 123 | 20.90         | 2.73        | 20.07     | 0    | Moderate tumor burden, no invasion                                                                 |              |
| Gemcitabine                   | 57              | 120 | 20.40         | 3.1         | 22.90     | 0    | Moderate tumor burden, no invasion                                                                 |              |
| Average:                      |                 |     |               | <b>2.26</b> |           |      |                                                                                                    |              |
| MSCs siKrasG12D-2 iExo CB     | 75              | 138 | 19.70         | 5.83        | 24.26     | 11   | Moderate tumor burden, liver invasion, macroscopic lung nodules                                    |              |
| MSCs siKrasG12D-2 iExo CB     | 45              | 108 | 22.40         | 1.96        | 20.00     | 13   | Moderate tumor burden, spleen and diaphragm invasion, macroscopic lung nodules                     |              |
| MSCs siKrasG12D-2 iExo CB     | 45              | 108 | 18.80         | 1.78        | 16.15     | 29   | Moderate tumor burden, spleen, kidney and diaphragm invasion, macroscopic lung nodules             |              |
| MSCs siKrasG12D-2 iExo CB     | 44              | 107 | 20.60         | 1.72        | 18.87     | 0    | Moderate tumor burden, spleen, kidney, peritoneal and diaphragm invasion                           |              |
| MSCs siKrasG12D-2 iExo CB     | 76              | 139 | 21.70         | 5.3         | 23.67     | 48   | Moderate tumor burden, spleen, kidney and small intestine invasion, macroscopic lung nodules       |              |
| MSCs siKrasG12D-2 iExo CB     | 44              | 107 | 21.30         | 1.98        | 24.97     | 0    | Moderate tumor burden, spleen, kidney, liver and diaphragm invasion                                |              |
| MSCs siKrasG12D-2 iExo CB     | 36              | 99  | 21.00         | 1.34        | 21.60     | 0    | Moderate tumor burden, diaphragm invasion                                                          |              |
| MSCs siKrasG12D-2 iExo CB     | 44              | 107 | 18.90         | 1.86        | 20.00     | 15   | Small tumor, diaphragm invasion, lymph node metastases, macroscopic lung nodules                   |              |
| Average:                      |                 |     |               | <b>2.72</b> |           |      |                                                                                                    |              |
| MSCs siKrasG12D-2 iExo CB+Gem | 67              | 130 | 20.20         | 3.32        | 23.84     | >200 | Moderate tumor burden, spleen and kidney invasion, macroscopic lung nodules                        |              |
| MSCs siKrasG12D-2 iExo CB+Gem | 46              | 109 | 20.60         | 1.14        | 19.85     | 0    | Small tumor, hunched posture, liver invasion                                                       |              |
| MSCs siKrasG12D-2 iExo CB+Gem | 75              | 138 | 19.20         | 2.27        | 21.00     | 8    | Moderate tumor burden, spleen, kidney, liver and diaphragm invasion, macroscopic lung nodules      |              |
| MSCs siKrasG12D-2 iExo CB+Gem | 70              | 133 | 19.20         | 3.87        | 23.84     | 11   | Moderate tumor burden, spleen, kidney and diaphragm invasion, macroscopic lung nodules             |              |
| MSCs siKrasG12D-2 iExo CB+Gem | 50              | 113 | 21.00         | 4.56        | 23.00     | 71   | Moderate tumor burden, ascites, spleen, kidney and diaphragm invasion, macroscopic lung nodules    |              |
| MSCs siKrasG12D-2 iExo CB+Gem | 50              | 113 | 18.40         | 1.73        | 19.84     | 0    | No tumor, hunched posture, weak, diarrhea, weight loss, no invasion                                |              |
| MSCs siKrasG12D-2 iExo CB+Gem | 95              | 158 | 20.20         | 3.10        | 25.00     | 10   | Moderate tumor burden, spleen, liver and diaphragm invasion, macroscopic lung nodules              |              |
| MSCs siKrasG12D-2 iExo CB+Gem | 87              | 150 | 20.00         | 1.46        | 16.44     | 0    | Moderate tumor burden, spleen, liver and diaphragm invasion                                        |              |
| Average:                      |                 |     |               | <b>2.68</b> |           |      |                                                                                                    |              |

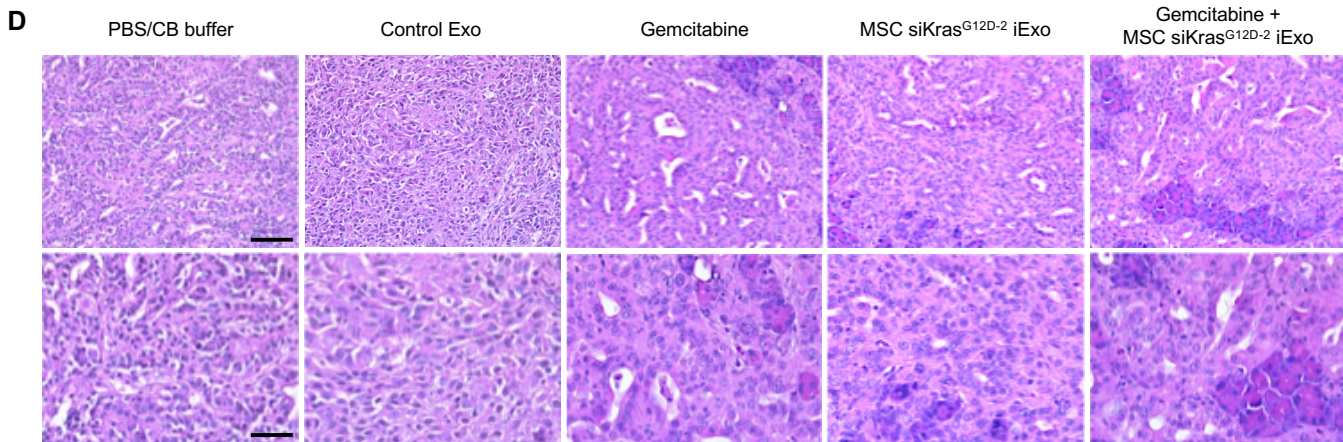

A

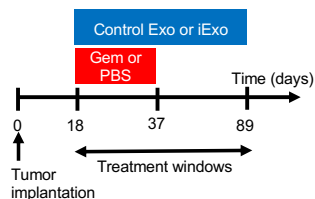

B

| Treatment                     | Survival (Days) |     | Pre-treatment |       | End-point   |      | Lung Metastases                                                                                                                                                                                                      | Observations |
|-------------------------------|-----------------|-----|---------------|-------|-------------|------|----------------------------------------------------------------------------------------------------------------------------------------------------------------------------------------------------------------------|--------------|
|                               | PTS             | PB  | BW(g)         | TW(g) | BW(g)       |      |                                                                                                                                                                                                                      |              |
| CB                            | 46              | 116 | 19.50         | 4.14  | 25.50       | 6    | Large primary tumor, secondary tumor, peritoneal, diaphragm, stomach, spleen and liver invasion, mesenteric lymph node metastasis, macroscopic lung nodules                                                          |              |
| CB                            | 37              | 107 | 19.00         | 5.04  | 24.95       | >100 | Moderate tumor, spleen, liver, diaphragm and stomach invasion, macroscopic lung nodules                                                                                                                              |              |
| CB                            | 47              | 117 | 20.00         | 1.36  | 16.90       | 0    | Small tumor, bleeding, diaphragm invasion, mesenteric lymph node metastasis                                                                                                                                          |              |
| CB                            | 37              | 107 | 20.00         | 5.35  | 22.56       | 34   | Moderate tumor, paraaortic lymph node metastasis, diaphragm and spleen invasion, possible stomach invasion, macroscopic lung nodules.                                                                                |              |
| CB                            | 42              | 113 | 19.50         | 1.80  | 25.00       | 14   | Moderate tumor, bleeding, mesenteric lymph node metastases, diaphragm invasion, liver invasion, spleen invasion, macroscopic lung nodules.                                                                           |              |
| CB                            | 37              | 107 | 19.00         | 2.73  | 18.71       | 9    | Moderate tumor, spleen, lymph node and diaphragm invasion, macroscopic lung nodules                                                                                                                                  |              |
| CB                            | 53              | 124 | 20.00         | 3.46  | 26.04       | 3    | Large primary tumor, secondary tumor, peritoneal, diaphragm, spleen and liver invasion, mesenteric lymph node metastases, macroscopic lung nodules                                                                   |              |
| Average:                      |                 |     |               |       | <b>3.41</b> |      |                                                                                                                                                                                                                      |              |
| MSCs Ctrl Exo                 | 42              | 113 | 19.00         | 5.43  | 29.60       | 9    | Large primary tumor, bleeding, ascites, peritoneal, diaphragm, stomach and kidney invasion, lymph node metastases, macroscopic lung nodules                                                                          |              |
| MSCs Ctrl Exo                 | 42              | 113 | 20.00         | 1.63  | 22.00       | 2    | Moderate tumor, diaphragm, spleen, peritoneal and lymph node invasion, macroscopic lung nodules                                                                                                                      |              |
| MSCs Ctrl Exo                 | 60              | 131 | 19.5          | 7.12  | 27.8        | >100 | Large primary tumor, bleeding, ascites, liver, diaphragm, stomach, ovary and spleen invasion, mesenteric lymph node metastases, macroscopic lung nodules                                                             |              |
| MSCs Ctrl Exo                 | 39              | 109 | 20.00         | 2.02  | 22.16       | >100 | Moderate tumor, diaphragm invasion, liver invasion, spleen invasion, peritoneal invasion, Mesenteric lymph node invasion, macroscopic lung nodules                                                                   |              |
| MSCs Ctrl Exo                 | 41              | 112 | 19.50         | 4.18  | 23.37       | 32   | Large primary tumor, bleeding, diaphragm invasion, stomach invasion, kidney invasion, spleen invasion, macroscopic lung nodules                                                                                      |              |
| MSCs Ctrl Exo                 | 52              | 123 | 20.00         | 3.72  | 25.18       | 3    | Large primary tumor, ascites, bleeding, diaphragm, stomach, liver, kidney and spleen invasion, lymph node metastases, paraaortic lymph node metastases, hydronephrosis, ovarian metastases, macroscopic lung nodules |              |
| MSCs Ctrl Exo                 | 39              | 109 | 20.00         | 2.55  | 22.50       | 16   | Moderate tumor, bleeding, ascites, diaphragm, stomach, liver, spleen and peritoneal invasion, mesenteric lymph node invasion, macroscopic lung nodules                                                               |              |
| Average:                      |                 |     |               |       | <b>3.81</b> |      |                                                                                                                                                                                                                      |              |
| Gemotabine                    | 54              | 125 | 20.00         | 3.08  | 25.96       | 19   | Large primary tumor, bleeding, ascites, spleen, liver, stomach, diaphragm, peritoneal, ovarian and left kidney invasion, pleural bleeding, macroscopic lung nodules                                                  |              |
| Gemotabine                    | 56              | 127 | 20.00         | 3.49  | 25.38       | >100 | Large primary tumor, bleeding, ascites, diaphragm, stomach, ovary, spleen and small intestine invasion, possible liver invasion, macroscopic lung nodules                                                            |              |
| Gemotabine                    | 67              | 138 | 21.00         | 2.94  | 26.80       | 7    | Moderate tumor divided in two masses connected with necrotic core, very discolored liver (potential metastases), ovary and diaphragm invasion, macroscopic lung nodules.                                             |              |
| Gemotabine                    | 89**            | 160 | 20.00         | 1.03  | 21.90       | 0    | Ascites, small tumor, possible spleen invasion and inflammation, necrotic liver                                                                                                                                      |              |
| Gemotabine                    | 54              | 125 | 19.50         | 2.46  | 22.47       | 33   | Moderate tumor, bleeding, ascites, spleen, ovary and diaphragm invasion, hepatic lymph node metastases, paraaortic mesenteric lymph node metastases, macroscopic lung nodules                                        |              |
| Gemotabine                    | 67              | 138 | 20.00         | 2.49  | 27.70       | 2    | Moderate tumor divided in two mass connected, very discolored liver (potential metastases), macroscopic lung nodules                                                                                                 |              |
| Gemotabine                    | 89**            | 160 | 19.50         | 1.63  | 25.60       | 0    | Moderate tumor, bleeding, ascites, primary tumor attached to the abdominal wall and connected to the pancreas. Possible spleen invasion and inflammation, peripancreatic lymph node metastases, diaphragm invasion   |              |
| Average:                      |                 |     |               |       | <b>2.45</b> |      |                                                                                                                                                                                                                      |              |
| MSCs siKrasG12D-2 iExo CB     | 89**            | 160 | 20.00         | 2.58  | 23.60       | 0    | Small primary tumor, some ascites, peritoneal secondary tumor, diaphragm invasion                                                                                                                                    |              |
| MSCs siKrasG12D-2 iExo CB     | 66              | 137 | 20.00         | 4.18  | 25.58       | 5    | Large primary tumor with necrotic core, small secondary tumors (2), bleeding, ascites, lymph node metastases, spleen, liver, stomach and kidney invasion, diaphragm metastases, macroscopic lung nodules             |              |
| MSCs siKrasG12D-2 iExo CB     | 43              | 114 | 20.00         | 0.81  | 16.81       | 0    | Moderate tumor, tumor with necrotic core (hole), bleeding, ascites, diaphragm invasion                                                                                                                               |              |
| MSCs siKrasG12D-2 iExo CB     | 56              | 127 | 20.00         | 5.06  | 25.90       | 34   | Large primary tumor, tumor with necrotic core (hole), bleeding, ascites, mesenteric lymph node and colon invasion, macroscopic lung nodules                                                                          |              |
| MSCs siKrasG12D-2 iExo CB     | 89**            | 160 | 20.00         | 2.4   | 16.00       | 29   | Moderate primary tumor, secondary tumor not connected to the primary tumor, tumor with necrotic core (hole), diaphragm invasion, macroscopic lung nodules                                                            |              |
| MSCs siKrasG12D-2 iExo CB     | 67              | 138 | 20.00         | 7.7   | 30.21       | 2    | Large primary tumor, peritoneal lymph node and diaphragm invasion, macroscopic lung nodules                                                                                                                          |              |
| MSCs siKrasG12D-2 iExo CB     | 89**            | 160 | 20.00         | 0.2   | 23.40       | 0    | Remnant of primary tumor, some ascites, no invasion                                                                                                                                                                  |              |
| Average:                      |                 |     |               |       | <b>3.28</b> |      |                                                                                                                                                                                                                      |              |
| MSCs siKrasG12D-2 iExo CB+Gem | 89**            | 160 | 20.00         | 1.80  | 23.10       | 0    | Small primary tumor, no invasion                                                                                                                                                                                     |              |
| MSCs siKrasG12D-2 iExo CB+Gem | 89**            | 160 | 19.50         | 0.20  | 20.10       | 0    | Very small, remnant of tumor, large area of normal pancreas, edema in the capsule, no invasion                                                                                                                       |              |
| MSCs siKrasG12D-2 iExo CB+Gem | 89**            | 160 | 20.00         | 2.24  | 23.30       | 0    | Small primary tumor, area of normal pancreas, edema around the capsule, no invasion                                                                                                                                  |              |
| MSCs siKrasG12D-2 iExo CB+Gem | 89**            | 160 | 20.00         | 1.70  | 23.10       | 7    | Some ascites, spleen and diaphragm invasion, possible liver invasion, mesenteric lymph node metastases, lymph node metastases around the stomach, macroscopic lung nodules                                           |              |
| MSCs siKrasG12D-2 iExo CB+Gem | 59              | 130 | 20.00         | 1.52  | 22.56       | 20   | Small primary tumor, diaphragm invasion, macroscopic lung nodules                                                                                                                                                    |              |
| MSCs siKrasG12D-2 iExo CB+Gem | 65              | 136 | 20.00         | 3.25  | 30.88       | 9    | Small primary tumor, bleeding, ascites, spleen, stomach, kidney, ovary and diaphragm invasion, hepatic lymph node metastases, lymph node metastases, macroscopic lung nodules                                        |              |
| MSCs siKrasG12D-2 iExo CB+Gem | 89**            | 160 | 20.00         | 3.68  | 25.00       | 18   | Large primary tumor with area of normal pancreas, some ascites, bleeding, subcutaneous edema in the left flank, diaphragm invasion, macroscopic lung nodules                                                         |              |
| Average:                      |                 |     |               |       | <b>2.06</b> |      |                                                                                                                                                                                                                      |              |

**A**

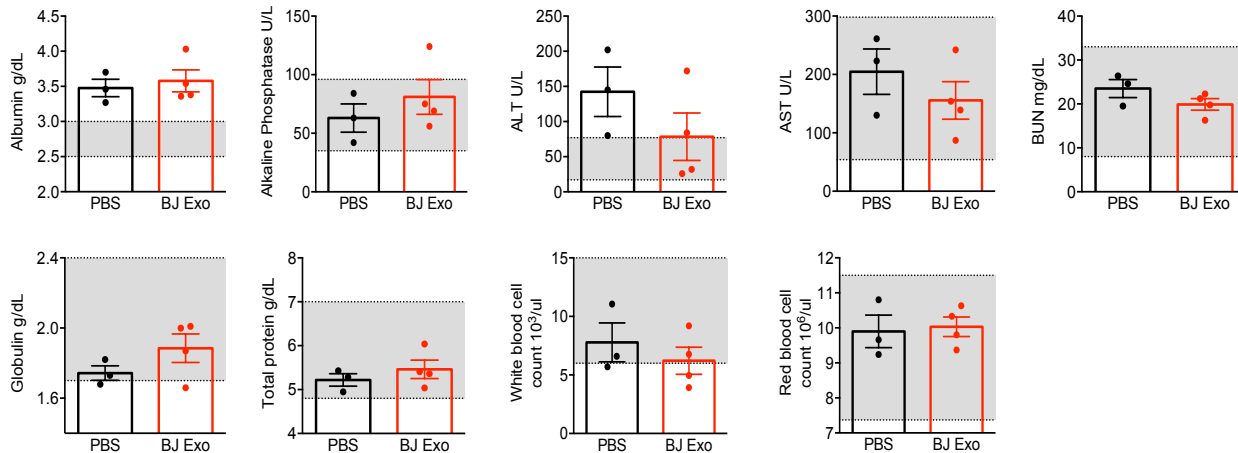

**B**

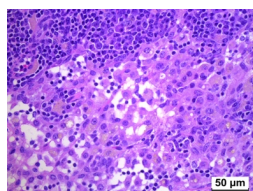

74K-Mesenteric lymph node-macrophages with yellow pigment

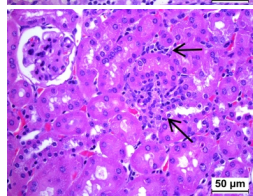

75K-Kidney inflammation, acute multifocal interstitial

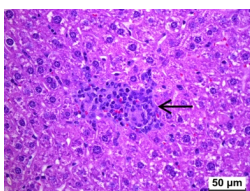

75K-Liver inflammation-acute multifocal

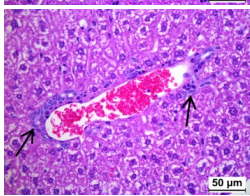

74K-Liver hyperplasia bile ducts

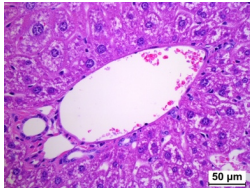

69K-Normal Liver

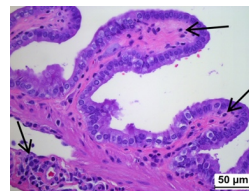

72k-Inflammation gall bladder

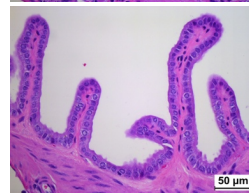

69K Normal gall bladder

**A**

Spleen

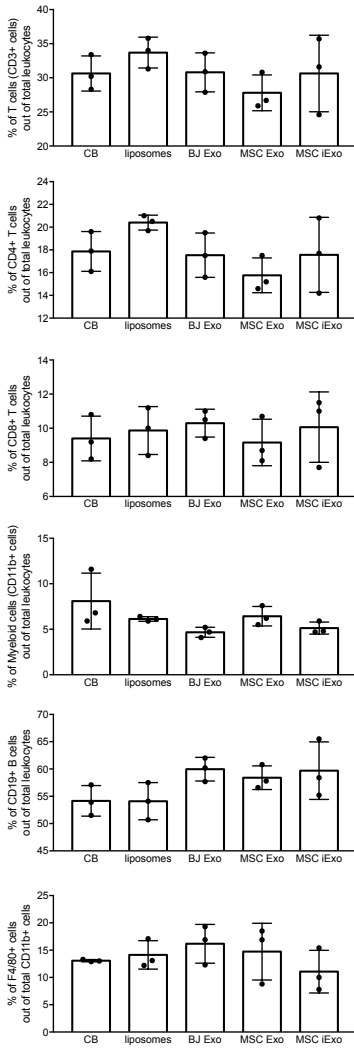

Bone marrow

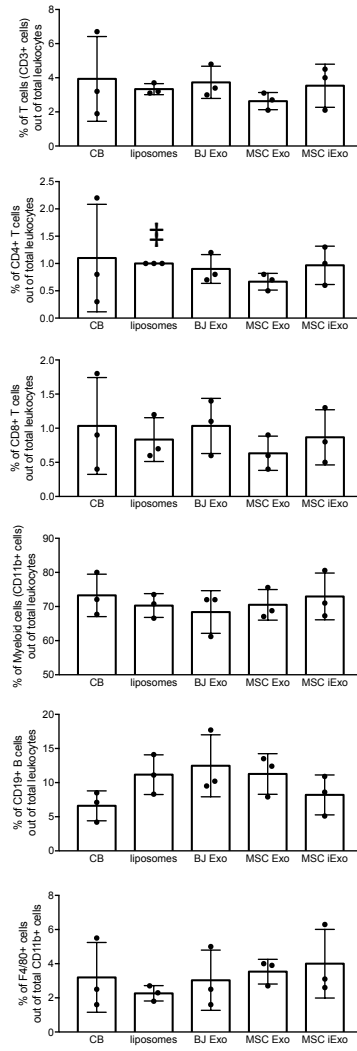

Thymus

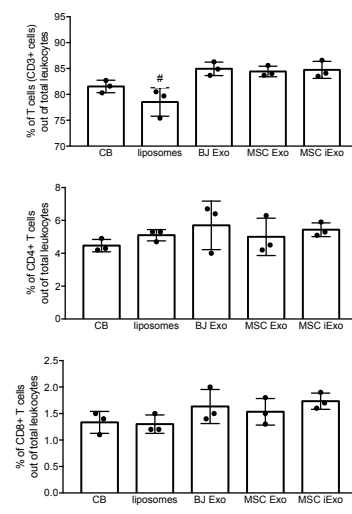

**B**

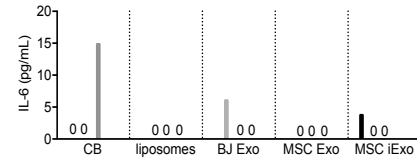

**A**

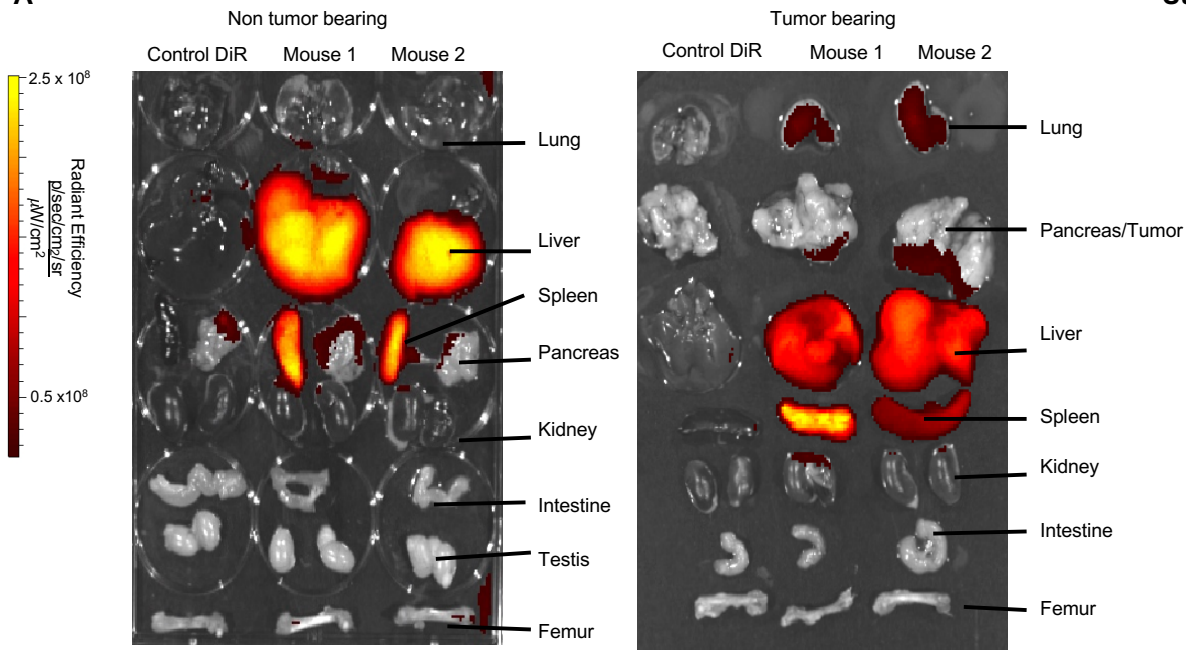

**B**

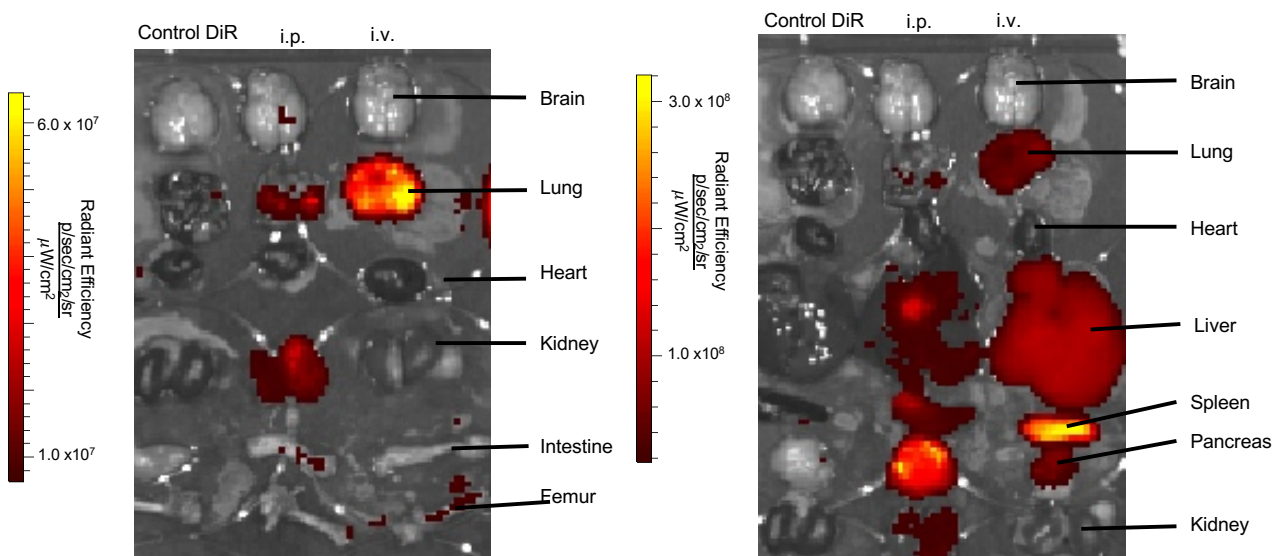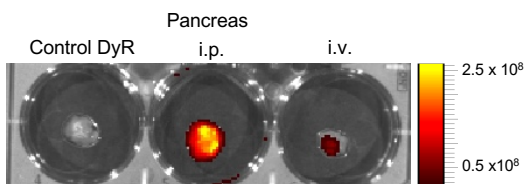

**C**

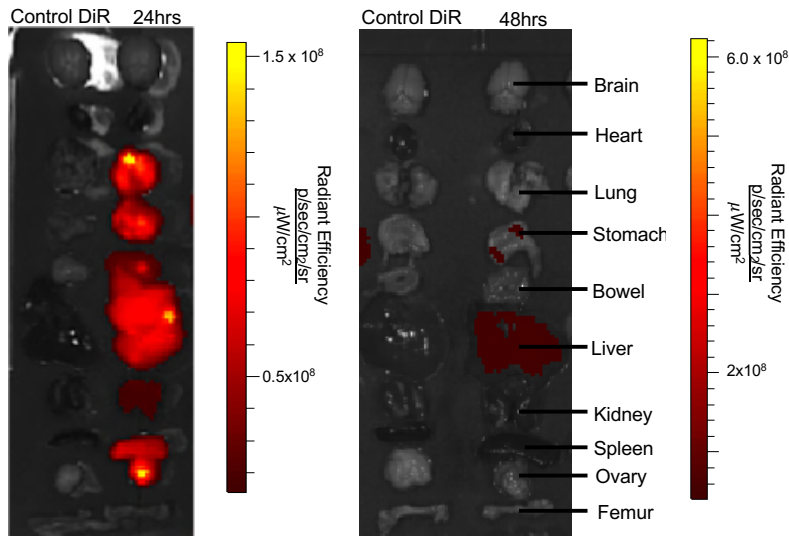

A

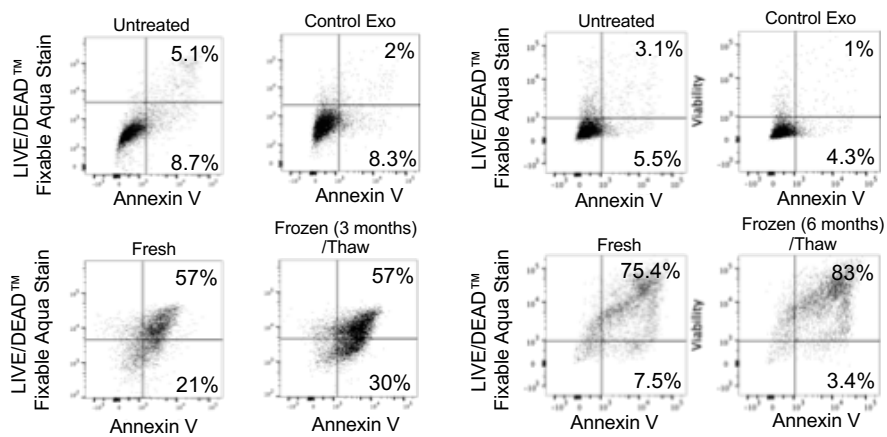

B

| Mouse ID       | Treatment       | Age: Treatment start | Survival:PB | End point    |             |
|----------------|-----------------|----------------------|-------------|--------------|-------------|
|                |                 |                      |             | BW (g)       | TW (g)      |
| sr31           | siKrasG12D iExo | 65                   | 117         | 13.52        | 0.28        |
| sr96           | siKrasG12D iExo | 66                   | 112         | 12.63        | 1.1         |
| sr23           | siKrasG12D iExo | 69                   | 122         | 19.66        | 0.75        |
| sm782          | siKrasG12D iExo | 75                   | 140         | 8.17         | 0.14        |
| J44            | siKrasG12D iExo | 60                   | 150         | 33.1         | 1.03        |
| J45            | siKrasG12D iExo | 60                   | 98          | 16.8         | 1.44        |
| J43            | siKrasG12D iExo | 60                   | 158         | 20.9         | <0.1        |
| <b>Average</b> |                 |                      |             | <b>17.83</b> | <b>0.79</b> |
| sr29           | Control Exo     | 64                   | 110         | 18.73        | 0.3         |
| sr257          | Control Exo     | 58                   | 92          | 18.2         | 1.28        |
| sr270          | Control Exo     | 60                   | 69          | N/A          |             |
| sr271          | Control Exo     | 60                   | 85          | 14.45        | 0.94        |
| sr475          | Control Exo     | 59                   | 101         | 16.2         | 1.45        |
| J54            | Control Exo     | 61                   | 113         | 16.66        | 1.3         |
| <b>Average</b> |                 |                      |             | <b>16.85</b> | <b>1.05</b> |

Supplemental Table 1

| Treatment Group                    | PBS                                                                                                                                                                                   | PBS          | PBS          | Exo          | Exo          | Exo          | Exo          |
|------------------------------------|---------------------------------------------------------------------------------------------------------------------------------------------------------------------------------------|--------------|--------------|--------------|--------------|--------------|--------------|
| Animal ID                          | 69K                                                                                                                                                                                   | 70k          | 71K          | 72K          | 73K          | 74K          | 75K          |
| Specie                             | mouse                                                                                                                                                                                 | mouse        | mouse        | mouse        | mouse        | mouse        | mouse        |
| Strain/Genotype                    | C57BL/6J                                                                                                                                                                              | C57BL/6J     | C57BL/6J     | C57BL/6J     | C57BL/6J     | C57BL/6J     | C57BL/6J     |
| Terminal body weight (grams)       | 37.16                                                                                                                                                                                 | 35.04        | 40.28        | 35.81        | 32.52        | 27.84        | 29.76        |
| Liver weight (grams)               | 2.02                                                                                                                                                                                  | 1.99         | 1.99         | 1.97         | 1.71         | 1.47         | 1.52         |
| Kidney weight (grams) - Right/Left | 0.49                                                                                                                                                                                  | 0.45         | 0.57         | 0.51         | 0.46         | 0.43         | 0.45         |
| Heart weight (grams)               |                                                                                                                                                                                       | 0.17         |              | 0.21         | 0.25         | 0.15         | 0.16         |
| Spleen weight (grams)              | 0.08                                                                                                                                                                                  | 0.07         | 0.11         | 0.08         | 0.07         | 0.10         | 0.10         |
| Block                              | Organ                                                                                                                                                                                 | Lesion Grade |
| No.                                | Morphologic Diagnosis                                                                                                                                                                 | Grade        | Grade        | Grade        | Grade        | Grade        | Grade        |
| A                                  | Liver                                                                                                                                                                                 | A            | A            | N            | N            | A            | A            |
|                                    | Inflammation, acute, mixed, multifocal                                                                                                                                                |              |              |              |              | 1            | 2            |
|                                    | Inflammation, acute, bile ducts                                                                                                                                                       |              |              |              |              | 1            | 2            |
|                                    | Hyperplasia, bile ducts                                                                                                                                                               |              |              |              |              | 1            | 1            |
|                                    | Extramedullary hematopoiesis, (incidental finding)                                                                                                                                    | 1            | 1            |              |              | 2            |              |
| A                                  | Gall Bladder                                                                                                                                                                          | N            | N            | N            | A            | A            | A            |
|                                    | Inflammation, acute, neutrophilic                                                                                                                                                     |              |              |              | 2            | 1            | 1            |
|                                    | Distended/dilated                                                                                                                                                                     |              |              |              |              | 3            |              |
| A                                  | Kidneys                                                                                                                                                                               | A            | A            | A            | A            | A            | A            |
|                                    | Inflammation, acute, mixed (neutrophils and macrophages), interstitial, multifocal                                                                                                    |              |              |              |              |              | 2            |
|                                    | Chronic Progressive Nephropathy (multifocal hyperplasia of cortical renal tubules; and/or proteinaceous tubular casts in the medullary renal tubules) (incidental age-related change) |              | 1            | 1            | 1            | 1            | 2            |
|                                    | Lymphoplasmacytic infiltration, perivascular, arcuate and mid-size blood vessels (incidental age-related change)                                                                      | 1            | 1            | 1            | 2            | 1            | 2            |
| B                                  | Lung                                                                                                                                                                                  | A            | N            | A            | N            | N            | A            |
|                                    | Inflammation, acute, mixed, perivascular                                                                                                                                              | 1            |              | 2            |              |              | 2            |
|                                    | Increased number of alveolar macrophages, diffuse                                                                                                                                     |              |              |              |              | 1            |              |
| C                                  | Heart                                                                                                                                                                                 | N            | N            | N            | N            | N            | N            |
| E                                  | Brain                                                                                                                                                                                 | N            | A            | N            | N            | A            | N            |
|                                    | Mineralization/calcification, multifocal, neuropil, thalamus, (incidental finding)                                                                                                    |              | 1            |              |              | 1            |              |
| M                                  | Mesenteric Lymph Node and Mesentery                                                                                                                                                   | 0            | A            | A            | N            | A            | A            |
|                                    | Hyperplasia, paracortex                                                                                                                                                               |              | 2            | 2            |              | 2            |              |
|                                    | Hyperplasia, lymphoid follicles                                                                                                                                                       |              |              |              |              | 2            | 1            |
|                                    | Apoptotic lymphocytes with tangible-body macrophages, paracortex                                                                                                                      |              | 2            | 3            |              | 2            | 2            |
|                                    | Macrophages with intracytoplasmic pale-yellow pigment/material in the medullary sinuses                                                                                               |              |              | 1            |              | 2            | 3            |
|                                    | Inflammation, acute (infiltration of neutrophils)                                                                                                                                     |              |              |              |              | 2            |              |
|                                    | Infiltration of mast cells in the medullary sinuses                                                                                                                                   |              |              |              |              | 2            |              |
|                                    | Plasmacytosis (increased number of plasma cells)                                                                                                                                      |              |              |              |              | 2            |              |
| M                                  | Spleen                                                                                                                                                                                | N            | N            | A            | A            | A            | A            |
|                                    | Hyperplasia, lymphocytic, periarteriolar lymphoid sheaths (white pulp)                                                                                                                |              |              |              |              | 1            | 2            |
|                                    | Plasmacytosis (increased number of plasma cells)                                                                                                                                      |              |              | 2            | 1            | 2            | 1            |
| T                                  | Bone marrow, femur, knee joint                                                                                                                                                        | N            | N            | N            | N            | N            | N            |
| U                                  | Bone marrow, sternum                                                                                                                                                                  | N            | N            | N            | A            | N            | N            |
|                                    | Plasmacytosis, focal                                                                                                                                                                  |              |              |              | 1            |              |              |

**Comment:**

Liver: Minimal to mild acute inflammation around the bile ducts in mice #73K, 74K, 75K, and of gall bladder in mice #72K, 73K, 75K, indicate mild injury to cholangiolar epithelium of bile ducts and gall bladder. Mild multifocal acute inflammation of mononuclear cells and neutrophils in the liver of mouse #75K is consistent with mild injury/toxicity to hepatocytes. Kidney: Mild acute multifocal interstitial inflammation suggests mild toxicity to epithelium of renal tubules. Immune System: Minimal to mild plasmacytosis and lymphoid hyperplasia of spleen and mesenteric lymph nodes in mice 71K, 72K, 73K, 74K, 75K indicate mild immune activation of lymphoid system and increased production of antibodies by plasma cells. Presence of macrophages with intracytoplasmic pale-yellow pigment in the sinusoids of mesenteric lymph nodes indicates increased phagocytosis of either foreign material, red cells, lipofuscin or ceroid material. Additionally, the mesenteric lymph node of mouse 74K had mild acute inflammatory reaction suggesting a regional injury from gastrointestinal tract or peritoneum.

**LEGEND**

N = Normal tissue or No significant lesion observed  
A = Abnormal tissue (Lesion present)  
0 = No tissue present on the slide  
P = The lesion is present, but not graded  
S = Suspected/Presumptive diagnosis (needs more tests to confirm the Dx.)  
PMA = Postmortem autolysis  
I = Inadequate section  
N/A= Not Applicable

**GRADING/SCORING OF HISTOLOGICAL LESIONS**

Grade 0 = **no histologic lesion** (or normal tissue)  
Grade 1 = **minimal**, minor, rare, infrequent, barely noticeable tissue change (lesion affects **1-10%** of the tissue)  
Grade 2 = **mild**, slight, sporadic, noticeable but not prominent feature (lesion affects **11-20%** of tissue)  
Grade 3 = **moderate**, frequent, typical, common, prominent tissue change (lesion affects **21-40%** of tissue)  
Grade 4 = **marked**, extensive, numerous, severe, overwhelming tissue change (lesion affects **41-100%** of tissue)
